# Supplementary material for: Mapping the suitability of groundwater dependent vegetation in a semi-arid Mediterranean area
Source: Copernicus journal article supplement (doi:10.5194/hess-2018-208), 2018-05-22
Supplement: Supplementary file [file hess-2018-208-AC1-supplement.pdf]

# 1 Mapping the suitability of groundwater dependent 2 vegetation in a semi-arid Mediterranean area

3  
4 Inês Gomes Marques<sup>1</sup>; João Nascimento<sup>2</sup>; Rita M. Cardoso<sup>1</sup>; Filipe Miguéns<sup>2</sup>; Maria  
5 Teresa Condesso de Melo<sup>2</sup>; Pedro M. M. Soares<sup>1</sup>; Célia M. Gouveia<sup>1</sup>; Cathy Kurz  
6 Besson<sup>1</sup>

7  
8 <sup>1</sup> Instituto Dom Luiz; Faculty of Sciences, University of Lisbon, Campo Grande, Ed. C8, 1749-016,  
9 Lisbon, Portugal

10 <sup>2</sup> CERIS; Instituto Superior Técnico, University of Lisbon, 1049-001, Lisbon, Portugal

11  
12 *Correspondence to:* Inês Gomes Marques (icgmarques@fc.ul.pt)

## 13 14 **Abstract.**

15 In this study, we modeled the distribution of deep-rooted woody species in southern Portugal from  
16 climatic, hydrological and topographic environmental variables. To achieve this, we first relied on the  
17 density of *Quercus suber*, *Quercus ilex* and *Pinus pinea* as proxy species of GDV. Model fitting was  
18 performed between the proxy species Kernel density and the selected environmental predictors using 1) a  
19 simple linear model and 2) a Geographically Weighted Regression (GWR), to account for auto-  
20 correlation of the spatial data and residuals. When comparing the results of both models, the GWR  
21 modelling results showed improved goodness of fitting, as opposed to the simple linear model. Climatic  
22 indices were the main drivers of GDV density closely followed by groundwater depth, drainage density  
23 and slope. Groundwater depth did not appear to be as pertinent in the model as initially expected,  
24 accounting only for about 6% of the total variation against 89% for climate drivers.

25 The relative proportions of model predictor coefficients were used as weighting factors for multicriteria  
26 analysis, to create a suitability map to the GDV in southern Portugal showing where the vegetation is  
27 most likely to rely on groundwater to cope with aridity. A validation of the resulting map was performed  
28 using independent data of the Normalized Difference Water Index (NDWI) a satellite-derived vegetation  
29 index. NDWI anomalies were calculated for June, July and August of 2005 in reference to years 1999-  
30 2009 to assess the response of active woody species in the region after an extreme drought. The results  
31 from the NDWI anomaly provided an overall good agreement between areas with good or bad suitability  
32 to host GDV. The model was considered reliable to predict the distribution of the studied vegetation.  
33 However, lack of data quality and information were shown to be the main cause for suitability  
34 discrepancies between maps.

35 The methodology developed to map GDV's will allow to predict the evolution of the distribution of GDV  
36 according to climate change scenarios and aid stakeholder decision-making concerning priority areas of  
37 water resources management.

38 **Keywords:** Groundwater dependent ecosystems, aridity, agroforestry, suitability map.

39

## 40 **1 Introduction**

41

42 Mediterranean forests, woodlands and shrublands, mostly growing under restricted water availability, are  
43 one of the terrestrial biomes with higher volume of groundwater used by vegetation (Evaristo and  
44 McDonnell, 2017). Future predictions of decreased precipitation (Giorgi and Lionello, 2008; Nadezhkina  
45 et al., 2015), decreased runoff (Mourato et al., 2015) and aquifer recharge (Ertürk et al., 2014; Stigter et  
46 al., 2014) in the Mediterranean region threaten the sustainability of groundwater reservoirs and the  
47 corresponding dependent ecosystems. Therefore, a sustainable management of groundwater resources and  
48 the Groundwater Dependent Ecosystems (GDE) is of crucial importance.

49 Mapping GDE constitutes a first and fundamental step to their active management. Several approaches  
50 have been proposed, including remote sensing techniques (e.g. Normalized Difference Vegetation Index –  
51 NDVI) (Barron et al., 2014; Eamus et al., 2015; Howard and Merrifield, 2010), remote-sensing combined  
52 with ground-based observations (Lv et al., 2013), based on geographic information system (GIS) (Pérez  
53 Hoyos et al., 2016a) or statistical approaches (Pérez Hoyos et al., 2016b). An integrated multidisciplinary  
54 methodology (Condesso de Melo et al., 2015) has also been used. A widely used classification of GDE  
55 was proposed by Eamus et al. (2006). This classification distinguishes three types: 1) Aquifer and cave  
56 ecosystems, which includes all subterranean waters; 2) Ecosystems reliant on surface groundwater (e.g.  
57 estuarine systems, wetlands; riverine systems) and 3) Ecosystems reliant on subsurface groundwater (e.g.  
58 systems where plants remain physiologically active during extended drought periods, without visible  
59 water source).

60 Despite of a wide-ranging body of literature regarding GDE, most of the studies do not include  
61 Mediterranean regions (Doody et al., 2017; Dresel et al., 2010; Münch and Conrad, 2007). Moreover,  
62 studies on ecosystems relying on subsurface groundwater frequently only focused on riparian  
63 environments (Lowry and Loheide, 2010; O’Grady et al., 2006), with few examples in Mediterranean  
64 areas (del Castillo et al., 2016; Fernandes, 2013; Hernández-Santana et al., 2008; Mendes et al., 2016).  
65 There is a clear knowledge gap concerning the identification of such ecosystems, their phreatophyte  
66 associated vegetation (Robinson, 1958) in the Mediterranean region and the management actions that  
67 should be taken to decrease the adverse effects of climate change.

68 In the driest regions of the Mediterranean basin, the persistent lack of water during the entire summer  
69 periods selected plants with drought-avoiding strategies, like those that reach deeper stored water up to  
70 the point of relying on groundwater (Canadell et al., 1996; Miller et al., 2010). Groundwater access by  
71 deep rooting species is often associated to hydraulic lift and/or hydraulic redistribution mechanisms  
72 (Orellana et al., 2012). Those mechanisms provide the ability to move water from deep soil layers, where  
73 water content is higher, to more shallow layers where water content is lower (Horton and Hart, 1998;  
74 Neumann and Cardon, 2012). Hydraulic lift and redistribution have been reported for several woody  
75 species of the Mediterranean basin (David et al., 2007; Filella and Peñuelas, 2004) and noticeably for  
76 Cork oak (*Quercus suber* L.) (David et al., 2013; Kurz-Besson et al., 2006; Mendes et al., 2016).

77 Cork oak woodlands are agro-silvo-pastoral systems of the southwest Mediterranean basin (Joffre et al.,  
78 1999) that have already been referenced as a groundwater dependent terrestrial ecosystem (Mendes et  
79 al., 2016). In the ecosystems of this geographical area, the dominant tree species are the cork oak  
80 (*Quercus suber* L.) and the Portuguese holm oak (*Quercus ilex* subs *rotundifolia* Lam.) (Pinto-Correia et  
81 al., 2011). Additionally, stone pine (*Pinus pinea* L.) has become a commonly co-occurrent species in the  
82 last decades (Coelho and Campos, 2009). The use of groundwater has been frequently reported for both  
83 *Pinus* (Filella and Peñuelas, 2004; Grossiord et al., 2016; Peñuelas and Filella, 2003) and *Quercus*  
84 (Barbeta and Peñuelas, 2017; David et al., 2007, 2013, Kurz-Besson et al., 2006, 2014; Otieno et al.,  
85 2006) genre. Furthermore, the contribution of groundwater to tree physiology has been shown to be of a  
86 greater magnitude for *Quercus* sp. as compared with *Pinus* sp. (del Castillo et al., 2016; Evaristo and  
87 McDonnell, 2017).

88 *Q. suber* and *Q. ilex* have been associated with high resilience and adaptability to hydric and thermic  
89 stress, and to recurrent droughts in the southern Mediterranean basin (Barbero et al., 1992). In Italy and  
90 Portugal, during summer droughts *Q. ilex* used a mixture of rain-water and groundwater and was able to  
91 take water from very dry soils (David et al., 2007; Valentini et al., 1992). An increasing contribution of  
92 groundwater in the summer has also been shown for this species (Barbeta et al., 2015). Similarly, *Q.*  
93 *suber* showed a seasonal shift in water sources, from shallow soil water in the spring to the beginning of  
94 the dry period followed by a progressive higher use of deeper water sources throughout the drought  
95 period (Otieno et al., 2006). In addition, the species roots are known to reach depths as deep as 13m in  
96 southern Portugal (David et al., 2004). Although co-occurrent to cork and holm oaks species, there is still  
97 no evidence yet that *P. pinea* relies on groundwater resources during the dry season. However it shows a  
98 very similar root system (Montero et al., 2004) as compared to cork oak (David et al., 2013), with large  
99 sinker roots reaching 5 m depth (Canadell et al., 1996). Given the information available on water use  
100 strategies by the phreatophyte arboreous species of the cork oak woodlands, we considered *Q. ilex*, *Q.*  
101 *suber* and *P. pinea* as proxies for vegetation that belongs to GDE relying on subsurface groundwater  
102 (from here onwards designed as Groundwater Dependent Vegetation – GDV).

103 GDV of the Mediterranean basin is often neglected in research. Indeed, still little is known about the  
104 GDV distribution, but research has already been done on the effects of climate change in specific species  
105 distribution, such as *Q. suber*, in the Mediterranean basin (Duque-Lazo et al., 2018; Paulo et al., 2015).  
106 While the increase in atmospheric CO<sub>2</sub> and the raising temperature can boost tree growth (Barbeta and  
107 Peñuelas, 2017; Bussotti et al., 2013; Sardans and Peñuelas, 2004), water stress can have a counteracting  
108 effect on growth of both *Quercus ilex* (López et al., 1997; Sabaté et al., 2002) and *P. pinaster* (Kurz-  
109 Besson et al., 2016). Therefore, it is of crucial importance to identify geographical areas where subsurface  
110 GDV is present and characterize the environmental conditions this vegetation type is thriving in. This  
111 would contribute to the understanding of how to manage these species under unfavorable future climatic  
112 conditions.

113 The aim of this study was to create a suitability map of the current distribution of the arboreous  
114 phreatophyte species considered here as GDV in southern Portugal, based on the occurrence of known  
115 and foreseen subsurface phreatophyte species and well-known environmental conditions affecting water

116 resources availability. Several environmental predictors were selected according to their impact on water  
117 use and storage and then used in a Geographically Weighted Regression (GWR) to model the density of  
118 *Q. suber*, *Q. ilex* and *P. pinea* occurrence in the Alentejo region (NUTSII) of southern Portugal. So far,  
119 very few applications of this method have been used to model species distribution and only recently its  
120 use has spread in ecological research (Hu et al., 2017; Li et al., 2016; Mazziotta et al., 2016). The  
121 coefficients proportions obtained from the model equation for each predictor were used as weights to  
122 build the suitability map with GIS multi-factor analysis, after reclassifying each environmental predictor.

123 Based on the environmental conditions of the study area and the species needs, we hypothesized that 1)  
124 groundwater depth together with climatic conditions play one of the most important environmental roles  
125 in GDV's distribution and 2) groundwater depth between 1.5 and 15m associated with xeric conditions  
126 should favor a higher density of GDV and thus a larger use of groundwater by the vegetation.

127

128

129 **2 Material and Methods**

130

131 **2.1 Study area**

132 The administrative region of Alentejo (NUTSII) (fig01) covers an area of 31 604.9 km<sup>2</sup>, between the  
133 latitude 37.22° to 39.39° N and longitude 9.00° to 6.55° W. This study area is characterized by a  
134 Mediterranean temperate mesothermic climate with hot and dry summers, defined as Csa in the Köppen  
135 classification (APA, n.d.; ARH Alentejo, 2012a, 2012b). It is characterized by a sub-humid climate,  
136 which has recently quickly drifted to semi-arid conditions (Ministério da Agricultura do Mar do  
137 Ambiente e do Ordenamento do Território, 2013). A large proportion of the area (above 40%) is covered  
138 by forestry systems (Autoridade Florestal Nacional and Ministério da Agricultura do Desenvolvimento  
139 Rural e das Pescas, 2010) providing a high economical value to the region and the country (Sarmiento and  
140 Dores, 2013).

141

142 **2.2 Kernel Density estimation of GDV**

143 Presence datasets of *Quercus suber*, *Quercus ilex* and *Pinus pinea* of the last Portuguese forest inventory  
144 achieved in 2010 (ICNF, 2013) were used to calculate Kernel density (commonly called heat map) as a  
145 proxy for GDV suitability. Only data points with one of the three proxy species selected as primary and  
146 secondary occupation were used. The resulting Kernel density was weighted according to tree cover  
147 percentage and was calculated using a quartic biweight distribution shape, a search radius of 10 km, and  
148 an output resolution of 0.018 degrees, corresponding to a cell size of 1km. This variable was computed  
149 using QGIS version 2.14.12 (QGIS Development Team, 2017).

150

151 **2.3 Environmental variables**

152 Species distribution is mostly affected by limiting factors controlling ecophysiological responses,  
153 disturbances and resources (Guisan and Thuiller, 2005). To characterize the study area in terms of GDV's  
154 suitability, environmental variables expected to affect GDV's density were selected according to their  
155 constraint on groundwater uptake and soil water storage. Within possible abiotic variables, landscape  
156 topography, geology, groundwater availability and regional climate were considered to map GDV  
157 density. The twelve selected variables for modeling purposes, retrieved from different data sources are  
158 listed in Table 1. The softwares used in spatial analysis were ArcGIS® software version 10.4.1 by Esri  
159 and R program software version 3.4.2 (R Development Core Team, 2016).

160

161 **2.3.1 Slope and soil characteristics**

162 The NASA and METI ASTER GDEM product was retrieved from the online Data Pool, courtesy of the  
163 NASA Land Processes Distributed Active Archive Center (LP DAAC), USGS/Earth Resources

164 Observation and Science (EROS) Center, Sioux Falls, South  
165 Dakota, [https://lpdaac.usgs.gov/data\\_access/data\\_pool/](https://lpdaac.usgs.gov/data_access/data_pool/). Spatial Analyst Toolbox was used to calculate the  
166 slope from the digital elevation model. Slope was used as proxy for the identification of shallow soil  
167 water interaction with vegetation.

168 The map of soil type was obtained from the Portuguese National Information System for the Environment  
169 - SNIAmb (© Agência Portuguesa do Ambiente, I.P., 2017) and uniformized to the World Reference  
170 Base with the Harmonized World Soil Database v 1.2 (FAO et al., 2009). The vector map was converted  
171 to raster using the Conversion Toolbox. To reduce the analysis complexity involving the several soil  
172 types present in the map, soil types were regrouped in three classes, according to their capacity to store or  
173 drain water (Table A1 in appendix A). The classification was based on the characteristics of each soil unit  
174 (available water storage capacity, drainage and topsoil texture) from the Harmonized World Soil  
175 Database (FAO et al., 2009). In the presence of dominant soil with little drainage capacity, AWC and  
176 mainly topsoil clay fraction, lower scores were given to higher shallow soil water retention and decreased  
177 suitability for GDV. Otherwise, when soil characteristics suggested water storage at deeper soil depths,  
178 lower AWC, drainage and sand topsoil texture, higher scores were given.

179 Effective soil thickness (Table 1) was also considered for representing the maximum soil depth explored  
180 by the vegetation roots. It constrains the expansion and growth of the root system, as well as the available  
181 amount of water that can be absorbed by roots.

182

### 183 **2.3.2 Groundwater availability**

184 Root access to water resources is one of the most limiting factors for GDV's growth and survival,  
185 especially during the dry season. The map of depth to water table was interpolated from piezometric  
186 observations from the Portuguese National Information System on Water Resources (SNIRH) public data  
187 base (<http://snirh.apambiente.pt>, last accessed on March 31<sup>st</sup> 2017) and the Study of Groundwater  
188 Resources of Alentejo (ERHSA) (Chambel et al., 2007). Data points of large-diameter wells and  
189 piezometers were retrieved for the Alentejo region (fig02) and sorted into undifferentiated, karst or  
190 porous geological types to model groundwater depth (GWDepth). In the studied area, piezometers are  
191 exclusively dedicated structures for piezometric observations, in areas with high abstraction volumes for  
192 public water supply. Oppositely, large wells are mainly devoted to private use and low volume  
193 abstractions. Due to the large heterogeneity of geological media, groundwater depth was calculated  
194 separately for each sub-basin. A total of 3158 data points corresponding to large wells and piezometers  
195 were used, with uneven measurements between 1979 and 2017. For each piezometer an average depth  
196 was calculated from the available observations and used as a single value. In areas with undifferentiated  
197 geological type, piezometric level and elevation were highly correlated (>0.9), thus a linear regression  
198 was applied to interpolate data. Ordinary kriging was preferred for the interpolation of karst and porous  
199 aquifers, combining large wells and piezometric data points. To build a surface layer of the depth to water  
200 table, the interpolated surface of the groundwater level was subtracted from the digital elevation model.  
201 Geostatistical Analyst ToolBox was used for this task.

202 Drainage density is a measure of how well the basin is drained by stream channels. It is defined as the  
203 total length of channels per unit area. Drainage density was calculated for a 10km grid size for the  
204 Alentejo region, by the division of the 10km square area (A) in km<sup>2</sup> by the total stream length (L) in km,  
205 as in Eq. (1).

$$206 \quad Dd = \frac{L}{A}, \quad (1)$$

207

### 208 **2.3.3 Regional Climate**

209 Temperature and precipitation datasets were obtained from the E-OBS  
210 (<http://eca.knmi.nl/download/ensembles/ensembles.php>, last accessed on March 31<sup>st</sup> 2017) public  
211 database (Haylock et al., 2008). Standardized Precipitation Evapotranspiration Index (SPEI), Aridity  
212 Index (AI) and Ombrothermic Indexes were computed from long-term (1951-2010) monthly temperature  
213 and precipitation observations. The computation of potential evapotranspiration (PET) was performed  
214 according to Thornthwaite (1948) and was assessed using the SPEI package (Beguería and Vicente-  
215 Serrano, 2013) in R program.

216 SPEI multi-scalar drought index (Vicente-Serrano et al., 2010) was calculated over a 6 month interval to  
217 characterize drought severity in the area of study using SPEI package (Beguería and Vicente-Serrano,  
218 2013) for R program. SPEI is based on the normalization of the water balance calculated as the difference  
219 between cumulative precipitation and PET for a given period at monthly intervals. Normalized values of  
220 SPEI typically range between -3 and 3. Drought events were considered as severe when SPEI values were  
221 between -1.5 and -1.99, and as extreme with values below -2 (Mckee et al., 1993). Severe and extreme  
222 SPEI predictors were computed as the number of months with severe or extreme drought, counted along  
223 the 60 years of the climate time-series.

224 While the SPEI index used in this study identifies geographical areas affected with more frequent extreme  
225 droughts, the Aridity index (AI) distinguishes arid geographical areas prone to annual negative water  
226 balance (with low AI value) to more mesic areas showing positive annual water balance (with high AI  
227 value). AI gives information related to evapotranspiration processes and rainfall deficit for potential  
228 vegetative growth. It was calculated following Eq. (2) according to Middleton et al. (1992), where PET is  
229 the average annual potential evapotranspiration and P is the average annual precipitation, both in mm for  
230 the 60 years period of the climate time-series. Dry lands are defined by their degree of aridity in 4 classes:  
231 Hyperarid (AI<0.05); Arid (0.05<AI<0.2); Semi-arid (0.2<AI<0.5) and Dry Subhumid (0.5<AI<0.65)  
232 (Middleton et al., 1992).

$$233 \quad AI = \frac{P}{PET}, \quad (2)$$

234 Ombrothermic Indexes were used to better characterize the bioclimatology of the study region (Rivas-  
235 Martínez et al., 2011), by evaluating soil water availability for plants during the driest months of the year.  
236 Four ombrothermic indexes were calculated according to a specific section of the year stated in Table 1,  
237 and following Eq. (3), where Pp is the positive annual precipitation (accumulated monthly precipitation



238 when the average monthly mean temperature is higher than 0°C) and  $T_p$  is the positive annual  
239 temperature (total in tenths of degrees centigrade of the average monthly temperatures higher than 0°).  
240 Ombrothermic index presenting values below 2 for the analyzed months, can be considered as  
241 Mediterranean bioclimatically. For non-Mediterranean areas, there is no dry period in which, for at least  
242 two consecutive months, the precipitation is less than or equal to twice the temperature.

$$243 \quad I_o = \frac{Pp}{Tp}, \quad (3)$$

244

## 245 **2.4 Model predictors selection**

246 The full set of environmental variables was evaluated as potential predictors for the suitability of GDV  
247 (based on the Kernel density of the proxy species). A preliminary selection was carried out, first by  
248 computing Pearson's correlation coefficients between environmental variables and second by performing  
249 a Principal Components Analysis (PCA) to detect multicollinearity. Covariates were discarded for  
250 modeling according to a sequential procedure. Whenever pairs of variables presented a correlation value  
251 above 0.4, the variable with the highest explained variance on the first axis of the PCA was selected. In  
252 addition, selected variables had to show the lowest possible correlation values between them. Variables  
253 showing low correlations and explaining a higher cumulative proportion of variability with the lowest  
254 number of PCA axis were later selected as predictors for modeling. PCA was performed using the GeoDa  
255 Software (Anselin et al., 2006) and Pearson's correlation coefficients were computed with Spatial Analyst  
256 Tool .

257

## 258 **2.5 Model development**

259 When fitting a linear regression model based on the selected variables, the normal distribution and  
260 stationarity of the model predictors and residuals must be assured.

261 The Kernel density of the proxy GDV species, *Q. suber*, *Q. ilex* and *P. pinea*, showed a skewed normal  
262 distribution. Therefore, a square-root normalization of the data was applied on this response variable,  
263 before model fitting. To be able to compare the resulting model coefficients and use them as weighting  
264 factors of the multi-criteria analysis to build the suitability map, the predictor variables were normalized  
265 using the z-score function. This allows to create standardized scores for each variable, by subtracting the  
266 mean of all data points from each individual data point, then dividing those points by the standard  
267 deviation of all points, so that the mean of each z-predictor is zero and the deviation is 1.

268 Spatial autocorrelation and non-stationarity are common when using linear regression on spatial data. To  
269 overcome these issues, Geographically Weighted Regression (GWR) was used to allow model  
270 coefficients to adjust to each location of the dataset, based on the proximity of sampling locations  
271 (Stewart Fotheringham et al., 1996). In this study, simple linear regression and GWR were both applied to  
272 the dataset and their performances compared. Models were fitted on a 5% random subsample of the entire  
273 dataset (6242 data points), due to computational restrictions and to decrease the spatial autocorrelation

274 effect (Kühn, 2007). This methodology has already been applied with a subsample of 10%, with points  
275 distant 10km from each other (Bertrand et al., 2016). In our dataset, even though we selected a 5%  
276 subsample, the mean and maximum distance between two random data points were, respectively, 3.6 km  
277 and 16.7 km, providing a good representation of local heterogeneity, as shown in figures 05 and 06. An  
278 additional analysis showing an excellent agreement between the two datasets is presented in FigA1 in  
279 appendix A.

280 Initially the model was constructed containing all selected predictors through the PCA and Pearson's  
281 correlation analysis. After, we sequentially discarded predictors so as to ascertain the model presenting  
282 lower second-order Akaike Information Criteria (AICc) and higher quasi-global  $R^2$  chosen to predict the  
283 suitability of GDV.

284 Adaptive Kernel bandwidths for the GWR model fitting were used due to the spatial irregularity of the  
285 random subsample. Bandwidths were obtained by minimizing the CrossValidation score (Bivand et al.,  
286 2008). To analyze the performance of the GWR model alone, the local and global adjusted R-squared  
287 were considered. To compare between the GWR model and the simple linear model, we considered the  
288 distribution of the model residuals, e.g. whether there were visible clustered values and the AICc. The  
289 spatial autocorrelation of the models residuals was evaluated with the Moran's I test (Moran, 1950) using  
290 the Spatial Statistics Tool, and also graphically. GWR model was fitted using the *spgwr* package from R  
291 program (Bivand and Yu, 2017).

292

## 293 **2.6 Suitability map building**

294 To create the suitability map we proceeded with the classification of all predictor layers included in the  
295 GWR model, similarly to Condesso de Melo et al. (2015) and Aksoy et al. (2017) . The likelihood of an  
296 interaction between the vegetation and groundwater resources was scored from 1 to 3 for each predictor.  
297 Scores were assigned after bibliographic review and expert opinion. The higher the score, the higher the  
298 likelihood, 1 corresponding to a weak likelihood and 3 indicating very high likelihood. Groundwater  
299 depth was divided in two classes, according to the accessibility to shallow soil water above 1.5 m and the  
300 maximum rooting depth for Mediterranean woody species reaching 13 m, reported by Canadell et al.  
301 (1996). Throughout the manuscript, we designated as shallow soil water the water between 0 and 1.5 m  
302 depth, while water below 1.5 m depth was considered as groundwater. The depth class between 0 and  
303 1.5m was based on the riparian vegetation in semi-arid Mediterranean areas which is mainly composed of  
304 shrub communities (Salinas et al., 2000) and present a mean rooting depths of 1.5m (Silva and Rego,  
305 2004). The most common tree species rooting depth in riparian ecosystems is normally similar to the  
306 depth of fine sediment not reaching gravel substrates (Singer et al., 2012) and not reaching levels as deep  
307 as deep-rooted species. The minimum score was given to areas where groundwater depth was too shallow  
308 (below 1.5 m) considered to belong to surface groundwater dependent vegetation. Areas with steep slope  
309 were considered to have superficial runoff and less recharge and influence negatively tree density (Costa  
310 et al., 2008). Those areas were treated as less suitable to GDV. Values of the Ombrothermic Index of the  
311 summer quarter and the immediately previous month (Ios4) were split in 3 classes according to Jenks



348

$$349 \quad NDWI = \frac{\rho_{NIR} - \rho_{MIR}}{\rho_{NIR} + \rho_{MIR}}. \quad (5)$$

350 Following Eq. (5), NDWI data were computed using B3 and MIR data acquired from VEGETATION  
351 instrument on board of SPOT4 and SPOT5 satellites. Extraction and corrections procedures applied to  
352 optimize NDWI series are fully described in Gouveia et al. (2009 and 2012).

353 The NDWI anomaly was computed as the difference between NDWI observed in June, July and August  
354 of 2005 and the median NDWI for the same month for the period 1999 to 2009. June was selected to  
355 provide the best signal from a still fully active canopy of woody species while the herbaceous layer had  
356 usually already finished its annual cycle and dried out. The hydrological year of 2004/2005 was  
357 characterized by an extreme drought event over the Iberian Peninsula, where less than 40% of the normal  
358 precipitation was registered in the southern area (Gouveia et al., 2009). Thus, in June 2005 the vegetation  
359 of the Alentejo region was already coping with an extreme long-term drought, which was well captured  
360 by the anomaly of the NDWI index, as shown by Gouveia et al. 2012.

361

## 362 3 Results

363

### 364 3.1 Kernel Density

365 Within the studied region of Portugal, the phreatophyte species *Quercus suber*, *Quercus ilex* and the  
366 suspected phreatophyte species *Pinus pinea* were not distributed uniformly throughout the territory. Areas  
367 with higher Kernel density (or higher distribution likelihood) were mostly spread between the northern  
368 part of Alentejo region and the western part close to the coast, with values ranging between 900 and 1200  
369 (fig03). Two clusters of high density also appeared below the Tagus river. The remaining study area  
370 presented mean density values, with a very low density in the area of the river Tagus.

371

### 372 3.2 Environmental conditions

373 The exploratory analysis of the variables, performed through the PCA and Pearson correlation matrix  
374 confirmed the presence of multicollinearity. From the initial variables (Table 1), Thickness, Spei\_severe,  
375 Spei\_extreme, Annual Ombrothermic Index (Io), Ombrothermic Index of the hottest month of the  
376 summer quarter(Ios1) and Ombrothermic Index of the summer quarter (Ios3) were discarded, while the  
377 variables slope, drainage density, soil type, groundwater depth, AI and Ios4 were maintained for analysis  
378 (figA2 and Table A1 in appendix). A sequential removal of each predictor from the model with the six  
379 variables was performed (table 2) which allowed to choose the model with the highest global R<sup>2</sup> (0.99)  
380 and the lowest AICc (18050.34). Therefore, five environmental variables out of the initial 12 considered  
381 (fig04) were endorsed to explain the variation of the Kernel density of GDV in Alentejo: AI, Ios4,  
382 GWDepth, Dd and slope.

383 In most part of the Alentejo region, slope was below 10% (fig04e) and coastal areas presenting the lowest  
384 values and variability. Highest values of groundwater depth (fig04c), reaching a maximum of 255 m,  
385 were found in the Atlantic margin of the study area, mainly in Tagus and Sado river basins. Several other  
386 small and confined areas in Alentejo also showed high values, corresponding to aquifers of porous or  
387 karst geological types. Most of the remaining study area showed groundwater depths ranging between 1.5  
388 m and 15 m. Figures 04a and 04b indicate the southeast of Alentejo as the driest area, given by minimum  
389 values of the aridity index (0.618), and potential evapotranspiration much higher than precipitation.

390 Besides, Ios4 presented a maximum value (0.714) for this region (meaning that soil water availability was  
391 not compensated by the precipitation of the previous M-J-J-A months). This is also supported by the  
392 higher drainage density in the southeast which indicates a lower prevalence of shallow soil water due to  
393 higher stream length by area.

394 Combining all variables, it was possible to distinguish two sub-regions with distinct conditions: the  
395 southeast of Alentejo and the Atlantic margin. The latter is mainly distinguished by its low slope areas,  
396 higher groundwater depth and more humid climatic conditions than the southeast of Alentejo.

397

### 398 3.3 Regression models

399 The best model to describe the GDV distribution was found through a sequentially discard of each  
400 variable (Table 2) and corresponded to the model with a distinct lower AICc (18050.76) compared with  
401 the second lowest AICc (27389.74) and showed an important increase in quasi-global R<sup>2</sup> (from 0.926 for  
402 the second best model to 0.992 for the best one). The best model fit was obtained with AI, Ios4,  
403 GWDepth, Dd and slope. This final model was then applied to the GIS layers to map the suitability of  
404 GDV in Alentejo, according to Eq. 6.

$$\begin{aligned} 405 \textit{Suitability} = & \textit{Intercept} + \textit{AI coef}_p * [\textit{reclassified AI value}] + \textit{Ios4 coef}_p * [\textit{reclassified Ios4 value}] + \\ 406 & \textit{GWDepth coef}_p * [\textit{reclassified GWDepth value}] + \textit{Dd coef}_p * [\textit{reclassified Dd value}] + \textit{slope coef}_p * \\ 407 & [\textit{reclassified slope value}], \end{aligned}$$

408 (6)

409 Local adjusted R-squared of the GWR model was highly variable throughout the study area, ranging from  
410 0 to 0.99 (fig05). Also, the local R-squared values below 0.5 corresponded to only 0.3% of the data. The  
411 lower R-squared values were distributed throughout the Alentejo area, with no distinct pattern. The  
412 overall fit of the GWR model was high (Table 3). The adjusted regression coefficient indicated that 99%  
413 of the variation in the data was explained by the GWR model, while only 0.02% was explained by the  
414 simple linear model (Table 3). Accordingly, GWR had a substantially lower AICc when compared with  
415 the simple linear model, indicating a much better fit.

416 The spatial autocorrelation given by the Moran Index (Griffith, 2009; Moran 1950) retrieved from the  
417 geospatial distribution of residual values was significant for both GWR and linear model. It was  
418 substantially lower for the GWR model though, than for the linear model (-z-score of 50.24 and 147.56  
419 respectively). Indeed, in the linear model (fig06b), positive residuals were condensed in the right side of  
420 Tagus and Sado river basins, while negative values were mainly present on the left side of the Tagus river  
421 and in the center-south of Alentejo. In the GWR model (fig06a) the positive and negative residual values  
422 were much more randomly scattered throughout the study region, highlighting a much better performance  
423 of the GWR, which minimized residual autocorrelation.

424 The spatial distribution of the coefficients of GWR predictors are presented in Fig07. They were later  
425 used for the computation of the GDV suitability score for each data point (Eq.6). The coefficient  
426 variability was three times higher for the Aridity Index as compared to Ios4 (fig08), reaching 66 and 22%  
427 respectively. For GWDepth, Dd and Slope, the coefficient variation was much lower, representing only  
428 about 6.2, 3.8 and 1.2% of the total variation observed in the coefficients, respectively. The remaining  
429 variables showed a median close to 0 and the Ios4 was the second with higher variability followed by the  
430 GWDepth. The coefficient median values were, respectively, -3.40, 0.29, -0.015, -0.018 and 0.022 for AI,  
431 Ios4, GWDepth, Dd and Slope variables.

432 The distributions of negative coefficients were similar for AI and the Ios4 variables (fig07a and fig07b),  
433 with lower values in the southern coastal area, and in the Tagus river watershed. The highest absolute  
434 values were mostly found for AI in the southern area of the Alentejo region and on smaller patches in the

435 northern region. In the center and eastern areas of Alentejo a higher weight of the groundwater depth  
436 coefficient could be found (fig07c), approximately matching a higher influence of slope (fig07e). The  
437 GWDepth seemed to have almost no influence on GDV density in the Tagus river watershed, expressed  
438 by coefficients mostly null around the riverbed (fig07c). The coefficient distribution Of Dd and Ios4  
439 shows some similarities, mostly in the center and southeast of Alentejo (fig07d). Extreme values of Ios4  
440 coefficients were mostly concentrated in the eastern part of the Tagus watershed and in the southern  
441 coastal area included in the Sado watershed. Slope coefficient values showed the lowest amplitude  
442 throughout the study area (fig07e), with prevailing high positive values gathered mainly in the center of  
443 the study area and in the Tagus river watershed (northwest of the study center).

444

### 445 **3.4 GDV Suitability map**

446 The classification of the 5 endorsed environmental predictors is presented in Table 4 and their respective  
447 maps in figure B1 in appendix B. Rivers Tagus and Sado had an overall positive impact on GDV's  
448 suitability for each predictor, with the exception of AI and GWDepth. This is due to a higher water  
449 availability reflected by the values of the Ios4, the Dd and the lower slopes due to the alluvial plains of  
450 the Tagus river (figs. B1b,d and e in appendix B). On the other hand, those regions also presented higher  
451 humidity conditions (through analysis of the AI in fig B1a in appendix B) and groundwater depths outside  
452 the optimum range (Fig. B1c in appendix B), therefore less suitable for GDV. Optimal conditions for  
453 groundwater access were mainly gathered in the interior of the study region (fig. B1c in appendix B), with  
454 the exception of some confined aquifers in the northeast and southeast of the study region. Favorable  
455 slopes for GDV were mostly highlighted in the Tagus river basin area, where a good likelihood of  
456 interaction between GDV and groundwater could be identified (fig. B1e in appendix B).

457 The final map illustrating the suitability to GDV is shown in Fig. 09. The proportion of each suitability  
458 class was quite evenly distributed throughout the study area. The largest area (8 787km<sup>2</sup>) presented a very  
459 poor suitability to GDV but corresponded only to approximately a quarter of the total study area (0.29%).  
460 This percentage was followed closely by the moderate suitability to GDV which occupied 0.26%  
461 (8000km<sup>2</sup>). Overall, the two less suitable classes (very poor and poor) represented 0.47% of the study  
462 area, whilst the two best ones and the moderate class (very good, good and moderate) represented 0.53%.  
463 Consequently, most of the study area showed high to moderate suitability to GDV. The very good and  
464 good suitability classes corresponded to the most southern and eastern center area of the Alentejo region,  
465 mainly close to the coastal line, passing through the Sado Guadiana river basins. Most of the center of the  
466 study area showed moderate to very good suitability do GDV, while the areas corresponding to the  
467 alluvial deposits of the Tagus river showed poor to very poor suitability.

468 The suitability to GDV in the Alentejo region was mainly driven by the AI, given by the highest  
469 coefficient variability associated to the AI predictor in the GWR model equation. This is also supported  
470 by the similar distribution pattern observed between the suitability map and the aridity index predictor  
471 (fig04a and fig09). Areas with good or very good suitability mostly matched areas of AI with score 3  
472 (Fig. B1a in appendix B). On the other hand, the lowest suitability classes showed a good agreement with

473 the lowest scores given to GWDepth (Fig. B1c in appendix B), mostly in the coastal area and in the Tagus  
474 river basin.

475

### 476 **3.5 Map validation**

477 To assess the accuracy of the suitability map developed in the present study, we compared our results  
478 with the NDWI anomaly considering the month of June of the dry year of 2005 in the Alentejo area  
479 (fig10). Both maps (figs 09 and 10) showed similar areas for higher and lower presence for GDV. The  
480 NDWI anomaly was mostly negative over the Alentejo territory indicating water stress in the vegetation  
481 leaves. Water stress due to the extreme drought was maximum (brown colour) in geographical areas  
482 matching the highest GDV suitability (fig09). It was less pronounced (mostly yellowish) in the central  
483 area of the Alentejo region between the Guadiana and Sado river basins where the vegetation presents a  
484 lower density (fig03). Areas with positive/null values of NDWI anomaly (corresponding to a higher water  
485 availability) were mostly distributed on the coastal area of the Atlantic ocean or close to riverbeds,  
486 namely in the Tagus and Sado floodplains (green colour, fig10), matching areas of poor suitability for  
487 GDV in Figure 09.

488



## 489 4 Discussion

490

### 491 4.1 Modeling approach

492 The Geographically Weighted Regression model has been used before in ecological studies (Li et al.,  
493 2016; Mazziotta et al., 2016), but never for the mapping of GDV, to our knowledge. This approach  
494 considerably improved the goodness of fit when compared to the linear model, with a coefficient of  
495 regression ( $R^2$ ) increasing from 0.02 to 0.99 at the global level, and an obvious reduction of residual  
496 clustering. Despite those improvements, it has not been possible to completely eliminate the residual  
497 autocorrelation after fitting the GWR model.

498 Kernel density for the study area provided a strong indication of presence and abundance of the tree  
499 species considered as GDV proxy for modeling. Mediterranean cork woodlands (Montados) are  
500 agroforestry systems considered as semi-natural ecosystems, that must be continually maintained through  
501 human management by thinning, understory use through grazing, ploughing and shrub clearing  
502 (Huntsinger and Bartolome, 1992) to maintain a good productivity, biodiversity and ecosystems service  
503 (Bugalho et al., 2009). Montados dominate about 76% of the Alentejo region (while only 7% is covered  
504 by stone pine). In those systems, tree density is known to be a tradeoff between climate drivers (Joffre  
505 1999, Gouveia & Freitas 2008) and the need for space for pasture or cereal cultivation in the understory  
506 (Acacio & Holmgreen 2014). In our study, the anthropologic management of agroforestry systems in the  
507 Alentejo region has not been taken into account. This could, at least partially, explain the non-randomness  
508 of the residual distribution after GWR model fitting as well as the mismatches between the GDV and the  
509 validation maps.

510 Another explanation of the reminiscent autocorrelation after GWR fitting could be the lack of  
511 groundwater dependent species in the model. For example, we decided to exclude *Pinus pinaster* Aiton  
512 due to its more humid distribution in Portugal, and due to conflicting conclusions driven from previous  
513 studies to pinpoint the species as a potential groundwater user (Bourke, 2004; Kurz-Besson et al., 2016).  
514 In addition, we excluded olive trees although the use of groundwater by an olive orchard has been  
515 recently proved (Ferreira et al., 2018), however with a weak contribution of groundwater to the daily root  
516 flow, and thus with no significant impact of groundwater on the species physiological conditions.

517 Methods previously used by Doody et al., (2017) and Condesso de Melo et al. (2015) to map specific  
518 vegetation relied solely on expert opinion, e.g. Delphi panel, to define weighting factors of environmental  
519 information for GIS multicriteria analysis. In our study, we used a GWR modelling approach to assess  
520 weighting factors for each environmental predictor in the study area, to build a suitability map for the  
521 GDV in southern Portugal. This allowed an empirical determination of the local relevance of each  
522 environmental predictor in GDV distribution, thus avoiding the inevitable subjectivity of Delphi panels.  
523 Modelling of the entire study region at a regional level did not provide satisfactory results. Therefore, we  
524 developed a general model varying locally according to local predictor coefficients. The local influence of  
525 each predictor was highly variable throughout the study area, especially for climatic predictors reflecting  
526 water availability and stress conditions. The application of the GWR model did not only allowed for a

527 localized approach, by decreasing the residual error and autocorrelation over the entire studied region, but  
528 also provided insights on how GDV's density can be explained by the main environmental drivers locally.  
529 Predictor coefficients showed a similar behavior in the spatial distribution of the coefficients. This was  
530 noticeable for the aridity index and the groundwater depth in the Tagus and Sado river basins.  
531 Groundwater depth had no influence on GDV's density in these areas and similarly, the coefficient of  
532 Aridity index showed a negative effect of increased humidity on GDV's density. In addition, a cluster of  
533 low drainage density values matched these areas.

534

#### 535 **4.2 Suitability to Groundwater Dependent Vegetation**

536

537 According to our results, more than half of the study area appears suitable for GDV. However, one  
538 quarter of the studied area showed the lowest suitability to GDV. The lower suitability to this vegetation  
539 in the more northern and western part of the studied area can be explained by less favorable climatic and  
540 hydrological conditions, resulting from the combination of a high aridity index and low groundwater  
541 depth scores (equivalent to high shallow soil water availability), corresponding to the coastal area and in  
542 the Tagus river basin.

543

544 Zomer et al. (2009) attempted to quantify the extent of agroforestry at the global level by performing a  
545 geospatial analysis of remote sensing derived global datasets. They showed that the average tree cover  
546 density within agricultural land can were closely linked to aridity with similar trends for different  
547 geographical areas. Our results agree with these findings since the aridity and ombrothermic indexes were  
548 the most important predictors of GDV density in the Alentejo region, according to our model outcomes.  
549 This is in agreement with former studies linking tree cover/density of Mediterranean oak woodland to  
550 climate drivers derived from precipitation (Gouveia and Freitas 2008, Joffre et al. 1999). Also, Waroux  
551 and Lambin (2012) studied the degradation of the argania woodlands in semi-arid to arid Southwest  
552 Morocco and found that a 44% decline of the forest density was mostly driven by the increasing aridity in  
553 the region between 1970 and 2007. Similarly, many studies carried out on oak woodlands in Italy and  
554 Spain identified drought as the main driving factor of tree die-back and as the main climate warning  
555 threatening oak stands sustainability in the Mediterranean basin (Gentilesca et al. 2017). Tree mortality  
556 linked to increasing drought stresses can also be associated to a geographical shift in vegetation  
557 communities (Lloret et al., 2004). For example, xeric plant species Sahel have expanded in the north of  
558 Sahel since the last half of the 20th century, toward areas of higher rainfall at an average rate of 500 to  
559 600 m yr<sup>-1</sup> (Gonçalez P., 2001).

560 In environments with scarce water sources such as the Mediterranean basin, plants have developed  
561 strategies to either avoid or escape drought stress (Chaves et al., 2003). The development of a dimorphic  
562 root systems in woody species is an adaptation strategy to escape drought (Dinis 2014, David et al.,  
563 2013). When comparing different water limited ecosystems from a global dataset, Schenk and Jackson

564 (2002) showed that rooting depth increased with aridity. Furthermore, a clear relationship between  
565 rooting depth and the water table depth was evidenced at global scale (Fan et al. 2017).

566 In our study, groundwater depth appeared to have a lower influence on GDV density than climate drivers,  
567 as reflected by the relative low magnitude of the GWDepth coefficient in our model outcomes. This  
568 surprisingly disagrees with our initial hypothesis because groundwater represents a notable proportion of  
569 the transpired water of deep-rooting phreatophytes, reaching up to 86% of absorbed water during drought  
570 periods and representing about 30.5% of the annual water absorbed by trees (David et al. 2013, Kurz-  
571 Besson et al. 2014). Nonetheless, this disagreement should be regarded cautiously due to the poor quality  
572 of the data used. On one hand, data points in the study region were highly heterogeneous, and certain  
573 areas showed a better statistical representation than others. Moreover, the high variability in geological  
574 media, topography and vegetation cover at the regional scale did not allow to account for small changes  
575 in groundwater depth (<15 m deep), which has a huge impact on GDV suitability (Canadell et al., 1996;  
576 Stone and Kalisz, 1991). Indeed, a high spatial resolution of hydrological database is essential to  
577 rigorously characterize the spatial dynamics of groundwater depth between hydrographic basins  
578 (Lorenzo-Lacruz et al., 2017). However, such resolution was not available for our study area. In addition,  
579 the lack of temporal data hampered the calculation of seasonal trends in groundwater depth, which are  
580 essential under Mediterranean conditions to build a reliable interpolation of observed data. Temporal data  
581 would also further help discriminate areas of optimal suitability to GDV, either during the wet and the dry  
582 seasons. Investigations efforts should be invested to fill the gap either by improving the Portuguese  
583 piezometric monitoring network, or by assimilating observations with remote sensing products focused on  
584 soil moisture or groundwater monitoring. This has already been performed for large regional scale such as  
585 GRACE satellite surveys, based on changes of Earth's gravitational field. So far, these technologies are  
586 not applicable to Portugal's scale, since the coarse spatial resolution of GRACE data only allows the  
587 monitoring of large reservoirs (Xiao et al. 2015).

588

#### 589 **4.4 Validation of the results**

590 Satellite derived remote-sensing products have been widely used to follow the impact of drought on land  
591 cover and the vegetation dynamics (AghaKouchak et al. 2015). Vegetation indexes offer excellent tools to  
592 assess and monitor plant changes and water stress (Asrar et al. 1989).

593 The understory of woodlands and the herbaceous layer of grasslands areas in southern Portugal usually  
594 ends their annual life cycles in June (Paço et al. 2007), while the canopy of woody species is still fully  
595 active with maximum transpiration rates and photosynthetic activities (Kurz-Besson et al. 2014, David et  
596 al. 2007, Awada et al. 2003). This is an ideal period of the year to spot differential response of the canopy  
597 of woody species to extreme droughts events using satellite derived vegetation indexes (Gouveia  
598 2012). In this manuscript we preferred the NDWI index to be more sensitive to canopy water content and  
599 a good proxy for water stress status in plants. Moreover, NDWI has been shown to be best related to the  
600 greenness of Cork oak woodland's canopy, expressed by the fraction of intercepted photosynthetically  
601 active radiation (Cerasoli et al., 2016).

602 By looking at the map of the NDWI anomaly in June 2005, it appears that the woody canopy showed a  
603 strong loss of canopy water in the areas where tree density and GDV suitability were higher (figs 03, 09 and  
604 10). This occurred although trees minimized the loss of water in leaves with a strong stomatal limitation  
605 in response to drought (Kurz-Besson et al. 2014, Grant et al. 2010). In the most arid area of the region  
606 where Holm oak is dominant but tree density is lower, the NDWI anomaly was generally less negative thus  
607 showing a lower water stress or higher canopy water content. Holm oak (*Quercus ilex* spp *rotundifolia*)  
608 is well known to be the most resilient species to drought conditions in Portugal, due to its capacity to use  
609 groundwater and a higher water use efficiency (David et al. 2007). Furthermore, by looking at the  
610 dynamics of NDWI anomaly (fig 10) we can see that the lower water stress status on the map is  
611 progressively spreading from the most arid areas to the milder ones from June to August 2005, despite the  
612 intensification of drought conditions. This endorses the idea that trees manage to cope with drought by  
613 relying on deeper water sources in response to drought, replenishing leaf water content despite the  
614 progression and intensification of drought conditions. Former studies support this statement by showing  
615 that groundwater uptake and hydraulic lift were progressively taking place after the onset of drought by  
616 promoting the formation of new roots reaching deeper soil layers and water sources, typically in July, for  
617 cork oak in the Alentejo region (Kurz-Besson et al., 2006, 2014). Root elongation following a declining  
618 water table has also been reported in a review on the effect of groundwater fluctuations on Phreatophytic  
619 vegetation (Nuamburg et al. 2005).

620 Our results and the dynamics of NDWI over summer 2005 tend to corroborate the studies of Schenk and  
621 Jackson (2002) and Fan et al. (2017), by suggesting a larger/longer dependency of GDV on groundwater  
622 with higher aridity. Further investigation needs to be carried on across aridity gradients in Portugal and  
623 the Iberian Peninsula to fully validate this statement, though.

624 Overall, the map of suitability to GDV showed an excellent agreement with the NDWI validation maps.  
625 The main areas showing good suitability are mostly matching in both maps. The good agreement between  
626 our GDV suitability maps, and validation maps opens the possibility to apply and extend the methodology  
627 to larger geographical areas such as the Iberian Peninsula, or the simulation of the impact of climate  
628 changes on the distribution of groundwater dependent species in the Mediterranean basin. Simulations of  
629 future climate conditions based on RCP4.5 and RCP8.5 emission scenarios (Soares et al., 2015, 2017)  
630 predict a significant decrease of precipitation for the Guadiana basin and overall decrease for the southern  
631 region of Portugal within 2100. Agroforestry systems relying on groundwater resources, such as cork oak  
632 woodlands, may show a decrease in productivity and ecosystem services or even face sustainability  
633 failure. An increase in aridity and drought frequency for the Mediterranean (Spinoni et al., 2017) will  
634 most probably induce a shift of GDV vegetation toward milder/wetter climates.

635

### 636 **4.3 Key limitations**

637 With the methodology applied in this study, weighting factors can be easily evaluated solely from local  
638 and regional observations of the studied area. Nonetheless, either the computation of model coefficients

639 or expert opinion to assess weighting factors, require update, and/or environmental data, species  
640 distribution and revised expert knowledge (Doody et al., 2017).

641 The evolution of groundwater depth in response to climate change is difficult to model on a large scale  
642 based on piezometric observations because it requires an excellent knowledge of the components and  
643 dynamics of water catchments. Therefore, a reliable estimation of the impact of climate change on GDV  
644 suitability in southern Portugal could only been performed on small scale studies. However, we showed  
645 that groundwater depth was only accounting for about 6% of the coefficient variation in the studied area,  
646 against 89% of the variation represented by climate indexes AI and Ios4. Changes in climate conditions  
647 only represents part of the water resources shortage issue in the future. Global-scale changes in human  
648 populations and economic progresses also rules water demand and supply, especially in arid and semi-  
649 arid regions (Vörösmarty et al., 2000). A decrease in useful water resources for human supply can induce  
650 an even higher pressure on groundwater resources (Döll, 2009), aggravating the water table drawdown  
651 caused by climate change (Ertürk et al., 2014). Therefore, additional updates of the model should include  
652 human consumption of groundwater resources, identifying areas of higher population density or intensive  
653 farming. Future model updates should also account for the interaction of deep rooting species with the  
654 surrounding understory species. In particular, shrubs surviving the drought period, which can benefit from  
655 the redistribution of groundwater by deep rooted species (Dawson, 1993; Zou et al., 2005).

656

657 **5 Conclusions**

658 Our results show a highly dominant contribution of water scarcity (Aridity and Ombrothermic indexes)  
659 on the density and suitability of deep-rooted groundwater dependent species. The contribution of  
660 groundwater depth was much lower than we initially expected, accounting only for 6% of the total  
661 coefficient variation. This might be underestimated however, due to the poor quality of the piezometric  
662 network especially in the central area of the studied region.

663 The current pressure applied by human consumption of water sources has reinforced the concern on the  
664 future of economic activities dependent on groundwater resources. To address this issue, several countries  
665 have developed national strategies for the adaptation of water sources for Agriculture and Forests against  
666 Climate Change, including Portugal (FAO, 2007). In addition, local drought management as long-term  
667 adaptation strategy has been one of the proposals of Iglesias et al. (2007) to reduce the climate change  
668 impact on groundwater resources in the Mediterranean. The preservation of Mediterranean agroforestry  
669 systems, such as cork oak woodlands and the recently associated *P. pinea* species, is of great importance  
670 due to their high socioeconomic value and their supply of valuable ecosystem services (Bugalho et al.,  
671 2011). Management policies on the long-term should account for groundwater resources monitoring,  
672 accompanied by defensive measures to ensure agroforestry systems sustainability and economical income  
673 from these Mediterranean ecosystems are not greatly and irreversibly threatened.

674 Our present study, and novel methodology, provides an important tool to help delineating priority areas of  
675 action for species and groundwater management, at regional level, to avoid the decline of productivity  
676 and cover density of the agroforestry systems of southern Portugal. This is important to guarantee the  
677 sustainability of the economical income for stakeholders linked to the agroforestry sector in that area.  
678 Furthermore, mapping vulnerable areas at a small scale (e.g. by hydrological basin), where reliable  
679 groundwater depth information is available, should provide further insights for stakeholder to promote  
680 local actions to mitigate climate change impact on GDV.

681 Based on the methodology applied in this work, future predictions on GDV suitability, according to the  
682 RCP4.5 and RCP8.5 emission scenarios will be shortly computed, providing guidelines for future  
683 management of these ecosystems in the allocation of water resources.

684

685 **6 Acknowledgements**

686

687 The authors acknowledge the E-OBS dataset from the EU-FP6 project ENSEMBLES (<http://ensembles->  
688 [eu.metoffice.com](http://ensembles-eu.metoffice.com)) and the data providers in the ECA&D project (<http://www.ecad.eu>). The authors also  
689 wish to acknowledge the ASTER GDEM data product, a courtesy of the NASA Land Processes  
690 Distributed Active Archive Center (LP DAAC), USGS/Earth Resources Observation and Science (EROS)  
691 Center, Sioux Falls, South Dakota, [https://lpdaac.usgs.gov/data\\_access/data\\_pool](https://lpdaac.usgs.gov/data_access/data_pool). We are grateful to  
692 ICNF for sharing inventory database performed in 2010 in Portugal continental. We also thank Célia  
693 Gouveia, Cristina Catita, Ana Russo and Patrícia Páscoa for the advice and helpful comments as well as  
694 Ana Bastos for the elaboration of the satellite datasets of the vegetation index NDWI. We are very  
695 grateful to Eric Font for the useful insights on soil properties. I Gomes Marques and research activities  
696 were supported by the Portuguese National Foundation for Science and Technology (FCT) through the  
697 PIEZAGRO project (PTDC/AAG-REC/7046/2014). The authors would like to thank the reviewers and  
698 editor for helpful comments and suggestions on an earlier version of the manuscript.

699

700 The authors declare that they have no conflict of interest.

701

702 **References**

- 703 Acácio V. and Holmgreen M.: Pathways for resilience in Mediterranean cork oak land use systems,  
704 *Annals of Forest Science*, 71, 5-13, doi: 10.1007/s13595-012- 0197-0, 2009
- 705 Aghakouchak, A., Farahmand, A., Melton, F. S., Teixeira, J., Anderson, M. C., Wardlow, B. D. and Hain  
706 C. R.: Remote sensing of drought: Progress, challenges and opportunities. *Reviews of Geophysics*, doi:  
707 10.1002/2014RG000456, 2015.
- 708 Aksoy, E., Louwagie, G., Gardi, C., Gregor, M., Schröder, C. and Löhnertz, M.: Assessing soil  
709 biodiversity potentials in Europe, *Sci. Total Environ.*, 589, 236–249, doi:10.1016/j.scitotenv.2017.02.173,  
710 2017.
- 711 Anderson, L. O., Malhi, Y., Aragão, L. E. O. C., Ladle, R., Arai, E., Barbier, N. and Phillips, O.: Remote  
712 sensing detection of droughts in Amazonian forest canopies. *New Phytologist*, 187, 733–750, doi:  
713 10.1111/j.1469-8137.2010.03355.x, 2010.
- 714 Anselin, L., Ibnu, S. and Youngihn, K.: GeoDa: An Introduction to Spatial Data Analysis, *Geogr. Anal.*,  
715 38(1), 5–22, 2006.
- 716 APA: Plano de Gestão da Região Hidrográfica do Tejo: Parte 2 - Caracterização e Diagnóstico da Região  
717 Hidrográfica, n.d.
- 718 ARH Alentejo: Plano de Gestão das Bacias Hidrográficas integradas na RH7 - Parte 2, 2012.
- 719 ARH Alentejo: Planos de Gestão das Bacias Hidrográficas integradas na RH6 - Parte 2, 2012.
- 720 Asrar, G. (Ed.): Estimation of plant-canopy attributes from spectral reflectance measurements, *Theory*  
721 *and Applications of Optical Remote Sensing*, pp. 252–296, John Wiley, New York, 1989.
- 722 Autoridade Florestal Nacional and Ministério da Agricultura do Desenvolvimento Rural e das Pescas: 50  
723 Inventário Florestal Nacional, 2010.
- 724 Awada T., Radoglou K., Fotelli M. N., Constantinidou H. I. A.: Ecophysiology of seedlings of three  
725 Mediterranean pine species in contrasting light regimes, *Tree Physiology*, 23, 33–41, 2003.
- 726 Barata, L. T., Saavedra, A., Cortez, N. and Varennes, A.: Cartografia da espessura efectiva dos solos de  
727 Portugal Continental. LEAF/ISA/ULisboa. [online] Available from: [http://epic-webgis-](http://epic-webgis-portugal.isa.utl.pt/)  
728 [portugal.isa.utl.pt/](http://epic-webgis-portugal.isa.utl.pt/), 2015.
- 729 Barbero, M., Loisel, R. and Quézel, P.: Biogeography, ecology and history of Mediterranean *Quercus ilex*  
730 ecosystems, in *Quercus ilex* L. ecosystems: function, dynamics and management, edited by F. Romane  
731 and J. Terradas, pp. 19–34, Springer Netherlands, Dordrecht., 1992.
- 732 Barbeta, A. and Peñuelas, J.: Increasing carbon discrimination rates and depth of water uptake favor the  
733 growth of Mediterranean evergreen trees in the ecotone with temperate deciduous forests, *Glob. Chang.*  
734 *Biol.*, 1–15, doi:10.1111/gcb.13770, 2017.
- 735 Barbeta, A., Mejía-Chang, M., Ogaya, R., Voltas, J., Dawson, T. E. and Peñuelas, J.: The combined  
736 effects of a long-term experimental drought and an extreme drought on the use of plant-water sources in a  
737 Mediterranean forest, *Glob. Chang. Biol.*, 21(3), 1213–1225, doi:10.1111/gcb.12785, 2015.
- 738 Barron, O. V., Emelyanova, I., Van Niel, T. G., Pollock, D. and Hodgson, O.G.: Mapping groundwater-  
739 dependent ecosystems using remote sensing measures of vegetation and moisture dynamics, *Hydrol.*  
740 *Process.*, 28(2), 372–385, doi:10.1002/hyp.9609, 2014.
- 741 Beguería, S. and Vicente-Serrano, S. M.: SPEI: Calculation of the Standardized Precipitation-  
742 Evapotranspiration Index. R package version 1.6., 2013.
- 743 Bertrand R., Riofrío-Dillon G., Lenoir J., Drapier J., de Ruffray P., Gégout J. C. and Loreau M.:  
744 Ecological constraints increase the climatic debt in forests, *Nature Communications*, 7, 12643, doi:  
745 10.1038/ncomms12643, 2016.



- 746 Bivand, R. and Yu, D.: spgwr: Geographically Weighted Regression. [online] Available from:  
747 <https://cran.r-project.org/package=spgwr>, 2017.
- 748 Bivand, R. S., Pebesma, E. J. and Gómez-Rubio, V.: Applied Spatial Data Analysis with R, edited by G.  
749 P. Robert Gentleman, Kurt Hornik, Springer., 2008.
- 750 Bourke, L.: Growth trends and water use efficiency of *Pinus pinaster* Ait. in response to historical climate  
751 and groundwater trends on the Gngangara Mound, Western Australia, 2004.
- 752 Bugalho, M. N., Plieninger, T. and Aronson, J.: Open woodlands: a diversity of uses (and overuses), in  
753 Cork oak woodlands on the edge, edited by J. Aronson, J. S. Pereira, and J. G. Pausas, pp. 33–48, Island  
754 Press, Washington DC., 2009.
- 755 Bugalho, M. N., Caldeira, M. C., Pereira, J. S., Aronson, J. and Pausas, J. G.: Mediterranean cork oak  
756 savannas require human use to sustain biodiversity and ecosystem services, *Front. Ecol. Environ.*, 9(5),  
757 278–286, doi:10.1890/100084, 2011.
- 758 Bussotti, F., Ferrini, F., Pollastrini, M. and Fini, A.: The challenge of Mediterranean sclerophyllous  
759 vegetation under climate change: From acclimation to adaptation, *Environ. Exp. Bot.*, 103(April), 80–98,  
760 doi:10.1016/j.envexpbot.2013.09.013, 2013.
- 761 Canadell, J., Jackson, R., Ehleringer, J., Mooney, H. A., Sala, O. E. and Schulze, E.-D.: Maximum  
762 rooting depth of vegetation types at the global scale, *Oecologia*, 108, 583–595, doi:10.1007/BF00329030,  
763 1996.
- 764 del Castillo, J., Comas, C., Voltas, J. and Ferrio, J. P.: Dynamics of competition over water in a mixed  
765 oak-pine Mediterranean forest: Spatio-temporal and physiological components, *For. Ecol. Manage.*, 382,  
766 214–224, doi:10.1016/j.foreco.2016.10.025, 2016.
- 767 Ceccato, P., Gobron, N., Flasse, S., Pinty, B. and Tarantola, S.: Designing a spectral index to estimate  
768 vegetation water content from remote sensing data: Part 1. Theoretical approach. *Remote Sensing of  
769 Environment*, 82, 188 – 197, 2002a.
- 770 Ceccato, P., Flasse, S. and Gregoire, J.: Designing a spectral index to estimate vegetation water content  
771 from remote sensing data: Part 2. Validation and applications. *Remote Sensing of Environment*, 82, 198 –  
772 207, 2002b.
- 773 Centenaro, G., Hudek, C., Zanella, A. and Crivellaro, A.: Root-soil physical and biotic interactions with a  
774 focus on tree root systems: A review, *Appl. Soil Ecol.*, doi:10.1016/J.APSOIL.2017.09.017, 2017.
- 775 Cerasoli S., Silva F.C. and Silva J. M. N.: Temporal dynamics of spectral bioindicators evidence  
776 biological and ecological differences among functional types in a cork oak open woodland, *Int J  
777 Biometeorol.*, 60 (6), 813–825, doi: 10.1007/s00484-015-1075-x, 2016.
- 778 Chambel, A., Duque, J. and Nascimento, J.: Regional Study of Hard Rock Aquifers in Alentejo, South  
779 Portugal: Methodology and Results, in *Groundwater in Fractured Rocks - IAH Selected Paper Series*, pp.  
780 73–93, CRC Press., 2007.
- 781 Chaves M. M., Maroco J. P. and Pereira J.S.: Understanding plant responses to drought — from genes to  
782 the whole plant, *Funct Plant Biol*, 30(3), 239 - 264, 2003.
- 783 Coelho, I. S. and Campos, P.: Mixed Cork Oak-Stone Pine Woodlands in the Alentejo Region of  
784 Portugal, in *Cork Oak Woodlands on the Edge - Ecology, Adaptive Management, and Restoration*, edited  
785 by J. Aronson, J. S. Pereira, J. Uli, and G. Pausas, pp. 153–159, Island Press, Washington, 2009.
- 786 Condesso de Melo, M. T., Nascimento, J., Silva, A. C., Mendes, M. P., Buxo, A. and Ribeiro, L.:  
787 Desenvolvimento de uma metodologia e preparação do respetivo guia metodológico para a identificação e  
788 caracterização, a nível nacional, dos ecossistemas terrestres dependentes das águas subterrâneas  
789 (ETDAS). Relatório de projeto realizado para a Agência Portuguesa do Ambiente, 2015.

- 790 Costa, A., Madeira, M. and Oliveira, C.: The relationship between cork oak growth patterns and soil,  
791 slope and drainage in a cork oak woodland in Southern Portugal, *For. Ecol. Manage.*, 255, 1525–1535,  
792 doi:10.1016/j.foreco.2007.11.008, 2008.
- 793 David, T. S., Ferreira, M. I., Cohen, S., Pereira, J. S. and David, J. S.: Constraints on transpiration from  
794 an evergreen oak tree in southern Portugal, *Agric. For. Meteorol.*, 122(3–4), 193–205,  
795 doi:10.1016/j.agrformet.2003.09.014, 2004.
- 796 David, T. S., Henriques, M. O., Kurz-Besson, C., Nunes, J., Valente, F., Vaz, M., Pereira, J. S., Siegwolf,  
797 R., Chaves, M. M., Gazarini, L. C. and David, J. S.: Water-use strategies in two co-occurring  
798 Mediterranean evergreen oaks: surviving the summer drought., *Tree Physiol.*, 27(6), 793–803,  
799 doi:10.1093/treephys/27.6.793, 2007.
- 800 David, T. S., Pinto, C. A., Nadezhdina, N., Kurz-Besson, C., Henriques, M. O., Quilhó, T., Cermak, J.,  
801 Chaves, M. M., Pereira, J. S. and David, J. S.: Root functioning, tree water use and hydraulic  
802 redistribution in *Quercus suber* trees: A modeling approach based on root sap flow, *For. Ecol. Manage.*,  
803 307, 136–146, doi:10.1016/j.foreco.2013.07.012, 2013.
- 804 Dawson, T. E.: Hydraulic lift and water use by plants: implications for water balance, performance and  
805 plant-plant interactions, *Oecologia*, 95, 565–574, 1993.
- 806 Dinis, C.O.: Cork oak (*Quercus suber* L.) root system: a structural-functional 3D approach. PhD Thesis,  
807 Universidade de Évora (Portugal), 2014.
- 808 Döll, P.: Vulnerability to the impact of climate change on renewable groundwater resources: a global-  
809 scale assessment, *Environ. Res. Lett.*, 4(4), 35006–12, doi:10.1088/1748-9326/4/3/035006, 2009.
- 810 Doody, T. M., Barron, O. V., Dowsley, K., Emelyanova, I., Fawcett, J., Overton, I. C., Pritchard, J. L.,  
811 Van Dijk, A. I. J. M. and Warren, G.: Continental mapping of groundwater dependent ecosystems: A  
812 methodological framework to integrate diverse data and expert opinion, *J. Hydrol. Reg. Stud.*, 10, 61–81,  
813 doi:10.1016/j.ejrh.2017.01.003, 2017.
- 814 Dresel, P. E., Clark, R., Cheng, X., Reid, M., Terry, A., Fawcett, J. and Cochrane, D.: Mapping  
815 Terrestrial Groundwater Dependent Ecosystems: Method Development and Example Output., 2010.
- 816 Duque-Lazo, J., Navarro-Cerrillo, R. M. and Ruíz-Gómez, F. J.: Assessment of the future stability of cork  
817 oak (*Quercus suber* L.) afforestation under climate change scenarios in Southwest Spain, *For. Ecol.*  
818 *Manage.*, 409(June 2017), 444–456, doi:10.1016/j.foreco.2017.11.042, 2018.
- 819 Eamus, D., Froend, R., Loomes, R., Hose, G. and Murray, B.: A functional methodology for determining  
820 the groundwater regime needed to maintain the health of groundwater-dependent vegetation, *Aust. J.*  
821 *Bot.*, 54(2), 97–114, doi:10.1071/BT05031, 2006.
- 822 Eamus, D., Zolfaghar, S., Villalobos-Vega, R., Cleverly, J. and Huete, A.: Groundwater-dependent  
823 ecosystems: Recent insights from satellite and field-based studies, *Hydrol. Earth Syst. Sci.*, 19(10), 4229–  
824 4256, doi:10.5194/hess-19-4229-2015, 2015.
- 825 Ertürk, A., Ekdal, A., Gürel, M., Karakaya, N., Guzel, C. and Gönenç, E.: Evaluating the impact of  
826 climate change on groundwater resources in a small Mediterranean watershed, *Sci. Total Environ.*, 499,  
827 437–447, doi:10.1016/j.scitotenv.2014.07.001, 2014.
- 828 Evaristo, J. and McDonnell, J. J.: Prevalence and magnitude of groundwater use by vegetation: a global  
829 stable isotope meta-analysis, *Sci. Rep.*, 7, 44110, doi:10.1038/srep44110, 2017.
- 830 Fan Y., Macho G. M., Jobbágy E. G., Jackson R. B. and Otero-Casal C.: Hydrologic regulation of plant  
831 rooting depth. *Proc. Natl Acad. Sci. USA* 114, 10 572–10 577, doi: 10.1073/pnas.1712381114, 2017.
- 832 FAO: Adaptation to climate change in agriculture, forestry and fisheries: Perspective, framework and  
833 priorities, Rome, 2007.
- 834 FAO, IIASA, ISRIC, ISS-CAS and JRC: Harmonized World Soil Database (version 1.1), 2009.

- 835 Fernandes, N. P.: Ecosistemas Dependentes de Água Subterranea no Algarve - Contributo para a sua  
836 Identificação e Caracterização, University of Algarve., 2013.
- 837 Ferreira, M. I., Green, S., Conceição, N. and Fernández, J.-E.: Assessing hydraulic redistribution with the  
838 compensated average gradient heat-pulse method on rain-fed olive trees, *Plant Soil*, 1–21,  
839 doi:10.1007/s11104-018-3585-x, 2018.
- 840 Filella, I. and Peñuelas, J.: Indications of hydraulic lift by *Pinus halepensis* and its effects on the water  
841 relations of neighbour shrubs, *Biol. Plant.*, 47(2), 209–214, doi:10.1023/B:BIOP.0000022253.08474.fd,  
842 2004.
- 843 Gao, B.C.: NDWI - A normalized difference water index for remote sensing of vegetation liquid water  
844 from space. *Remote Sensing of Environment*, 58, 257-266, 1996.
- 845 Gentilesca T., Camarero J. J., Colangelo M., Nolè A. and Ripullone F.: Drought-induced oak decline in  
846 the western Mediterranean region: an overview on current evidences, mechanisms and management  
847 options to improve forest resilience, *iForest*, 10, 796-806, doi: 10.3832/ifor2317-010, 2017.
- 848 Giorgi, F. and Lionello, P.: Climate change projections for the Mediterranean region, *Glob. Planet.*  
849 *Change*, 63(2–3), 90–104, doi:10.1016/j.gloplacha.2007.09.005, 2008.
- 850 Gond, V., Bartholome, E., Ouattara, F., Nonguierma, A. and Bado, L. Surveillance et cartographie des  
851 plans d'eau et des zones humides et inondables en regions arides avec l'instrument VEGETATION  
852 embarqué sur SPOT-4, *Int. J. Remote Sens*, 25, 987–1004, 2004.
- 853 Gonzalez, P.: Desertification and a shift of forest species in the West African Sahel, *Clim. Res.*, 17, 217–  
854 228, 2001.
- 855 Gouveia A. and Freitas H.: Intraspecific competition and water use efficiency in *Quercus suber*: evidence  
856 of an optimum tree density?, *Trees*, 22, 521-530, 2008.
- 857 Gouveia C., Trigo R. M., DaCamara C. C.: Drought and Vegetation Stress Monitoring in Portugal using  
858 Satellite Data, *Nat Hazards Earth Syst Sci*, 9, 1-11, doi: 10.5194/nhess-9-185-2009, 2009.
- 859 Gouveia C. M., Bastos A., Trigo R. M., DaCamara C. C.: Drought impacts on vegetation in the pre- and  
860 post-fire events over Iberian Peninsula, *Natural Hazards Earth System Sciences*, 12, 3123-3137,  
861 doi:10.5194/nhess-12-3123-2012, 2012.
- 862 Grant O. M., Tronina L., Ramalho J. C., Besson C. K., Lobo-do-Vale R., Pereira J. S., Jones H. G. and  
863 Chaves M. M.: The impact of drought on leaf physiology of *Quercus suber* L. trees: comparison of an  
864 extreme drought event with chronic rainfall reduction, *J. Exp. Bot.*, 61 (15), 4361–4371, doi:  
865 10.1093/jxb/erq239, 2010.
- 866 Griffith, D. A. (Ed.): *Spatial Autocorrelation*, Elsevier Inc, Texas, 2009.
- 867 Grossiord, C., Sevanto, S., Dawson, T. E., Adams, H. D., Collins, A. D., Dickman, L. T., Newman, B. D.,  
868 Stockton, E. A. and McDowell, N. G.: Warming combined with more extreme precipitation regimes  
869 modifies the water sources used by trees, *New Phytol.*, doi:10.1111/nph.14192, 2016.
- 870 Gu, Y., J. F. Brown, J. P. Verdin and Wardlow, B.: A five-year analysis of MODIS NDVI and NDWI for  
871 grassland drought assessment over the central Great Plains of the United States, *Geophys. Res. Lett.*, 34,  
872 L06407, doi:10.1029/2006GL029127, 2007.
- 873 Guisan, A. and Thuiller, W.: Predicting species distribution: Offering more than simple habitat models,  
874 *Ecol. Lett.*, 8(9), 993–1009, doi:10.1111/j.1461-0248.2005.00792.x, 2005.
- 875 Hagolle, O., Lobo, A., Maisongrande, P., Duchemin, B. and De Pereira, A.: Quality assessment and  
876 improvement of SPOT/VEGETATION level temporally composited products of remotely sensed imagery  
877 by combination of VEGETATION 1 and 2 images, *Remote Sens. Environ.*, 94, 172–186, 2005.

- 878 Haylock, M. R., Hofstra, N., Klein Tank, A. M. G., Klok, E. J., Jones, P. D. and New, M.: A European  
879 daily high-resolution gridded data set of surface temperature and precipitation for 1950-2006, *J. Geophys.*  
880 *Res. Atmos.*, 113(20), doi:10.1029/2008JD010201, 2008.
- 881 Hernández-Santana, V., David, T. S. and Martínez-Fernández, J.: Environmental and plant-based  
882 controls of water use in a Mediterranean oak stand, *For. Ecol. Manage.*, 255, 3707–3715,  
883 doi:10.1016/j.foreco.2008.03.004, 2008.
- 884 Horton, J. L. and Hart, S. C.: Hydraulic lift: a potentially important ecosystem process, *Tree*, 13(6), 232–  
885 235, doi:10.1016/j.tree.1998.03.004, 1998.
- 886 Howard, J. and Merrifield, M.: Mapping groundwater dependent ecosystems in California, *PLoS One*,  
887 5(6), doi:10.1371/journal.pone.0011249, 2010.
- 888 Hu, X., Zhang, L., Ye, L., Lin, Y. and Qiu, R.: Locating spatial variation in the association between road  
889 network and forest biomass carbon accumulation, *Ecol. Indic.*, 73, 214–223,  
890 doi:10.1016/j.ecolind.2016.09.042, 2017.
- 891 Huntsinger, L. and Bartolome, J. W.: Ecological dynamics of *Quercus* dominated woodlands in  
892 California and southern Spain: A state transition model. *Vegetation* 99–100, 299–305, 1992.
- 893 ICNF: IFN6 – Áreas dos usos do solo e das espécies florestais de Portugal continental. Resultados  
894 preliminares., Lisboa, 2013.
- 895 Iglesias, A., Garrote, L., Flores, F. and Moneo, M.: Challenges to manage the risk of water scarcity and  
896 climate change in the Mediterranean, *Water Resour. Manag.*, 21, 775–788, doi:10.1007/s11269-006-  
897 9111-6, 2007.
- 898 Joffre, R., Rambal, S. and Ratte, J. P.: The dehesa system of southern Spain and Portugal as a natural  
899 ecosystem mimic, *Agrofor. Syst.*, 45, 57–79, doi:10.1023/a:1006259402496, 1999.
- 900 Kühn, I.: Incorporating spatial autocorrelation may invert observed patterns, *Div and Dist*, 13, 66-69,  
901 doi:10.1111/j.1472-4642.2006.00293.x, 2007
- 902 Kurz-Besson, C., Otieno, D., Lobo Do Vale, R., Siegwolf, R., Schmidt, M., Herd, A., Nogueira, C.,  
903 David, T. S., David, J. S., Tenhunen, J., Pereira, J. S. and Chaves, M.: Hydraulic lift in cork oak trees in a  
904 savannah-type Mediterranean ecosystem and its contribution to the local water balance, *Plant Soil*, 282(1–  
905 2), 361–378, doi:10.1007/s11104-006-0005-4, 2006.
- 906 Kurz-Besson, C., Lobo-do-Vale, R., Rodrigues, M. L., Almeida, P., Herd, A., Grant, O. M., David, T. S.,  
907 Schmidt, M., Otieno, D., Keenan, T. F., Gouveia, C., Mériaux, C., Chaves, M. M. and Pereira, J. S.: Cork  
908 oak physiological responses to manipulated water availability in a Mediterranean woodland, *Agric. For.*  
909 *Meteorol.*, 184(December 2013), 230–242, doi:10.1016/j.agrformet.2013.10.004, 2014.
- 910 Kurz-Besson, C., Lousada, J. L., Gaspar, M. J., Correia, I. E., David, T. S., Soares, P. M. M., Cardoso, R.  
911 M., Russo, A., Varino, F., Mériaux, C., Trigo, R. M. and Gouveia, C. M.: Effects of recent minimum  
912 temperature and water deficit increases on *Pinus pinaster* radial growth and wood density in southern  
913 Portugal, *Front. Plant Sci*, 7, doi:10.3389/fpls.2016.01170, 2016.
- 914 Li, Y., Jiao, Y. and Browder, J. A.: Modeling spatially-varying ecological relationships using  
915 geographically weighted generalized linear model: A simulation study based on longline seabird bycatch,  
916 *Fish. Res.*, 181, 14–24, doi:10.1016/j.fishres.2016.03.024, 2016.
- 917 Lloret, F., Siscart, D. and Dalmases, C.: Canopy recovery after drought dieback in holm-oak  
918 Mediterranean forests of Catalonia (NE Spain), *Glob. Chang. Biol.*, 10(12), 2092–2099,  
919 doi:10.1111/j.1365-2486.2004.00870.x, 2004.
- 920 López, B., Sabaté, S., Ruiz, I. and Gracia, C.: Effects of Elevated CO<sub>2</sub> and Decreased Water Availability  
921 on Holm-Oak Seedlings in Controlled Environment Chambers, in *Impacts of Global Change on Tree*  
922 *Physiology and Forest Ecosystems: Proceedings of the International Conference on Impacts of Global*  
923 *Change on Tree Physiology and Forest Ecosystems*, held 26--29 November 1996, Wageningen, The

- 924 Netherlands, edited by G. M. J. Mohren, K. Kramer, and S. Sabaté, pp. 125–133, Springer Netherlands,  
925 Dordrecht., 1997.
- 926 Lorenzo-Lacruz, J., Garcia, C. and Morán-Tejeda, E.: Groundwater level responses to precipitation  
927 variability in Mediterranean insular aquifers, *J. Hydrol.*, 552, 516–531, doi:10.1016/j.jhydrol.2017.07.011,  
928 2017.
- 929 Lowry, C. S. and Loheide, S. P.: Groundwater-dependent vegetation: Quantifying the groundwater  
930 subsidy, *Water Resour. Res.*, 46(6), doi:10.1029/2009WR008874, 2010.
- 931 Lv, J., Wang, X. S., Zhou, Y., Qian, K., Wan, L., Eamus, D. and Tao, Z.: Groundwater-dependent  
932 distribution of vegetation in Hailiutu River catchment, a semi-arid region in China, *Ecohydrology*, 6(1),  
933 142–149, doi:10.1002/eco.1254, 2013.
- 934 Maki, M., Ishihara, M., Tamura, M.: Estimation of leaf water status to monitor the risk of forest fires by  
935 using remotely sensed data. *Remote Sens. Environ*, 90, 441–450, 2004.
- 936 Mazziotta, A., Heilmann-Clausen, J., Bruun, H. H., Fritz, Ö., Aude, E. and Tøttrup, A. P.: Restoring  
937 hydrology and old-growth structures in a former production forest: Modelling the long-term effects on  
938 biodiversity, *For. Ecol. Manage.*, 381, 125–133, doi:10.1016/j.foreco.2016.09.028, 2016.
- 939 Mckee, T. B., Doesken, N. J. and Kleist, J.: The relationship of drought frequency and duration to time  
940 scales, in *AMS 8th Conference on Applied Climatology*, pp. 179–184., 1993.
- 941 Mendes, M. P., Ribeiro, L., David, T. S. and Costa, A.: How dependent are cork oak (*Quercus suber* L.)  
942 woodlands on groundwater? A case study in southwestern Portugal, *For. Ecol. Manage.*, 378, 122–130,  
943 doi:10.1016/j.foreco.2016.07.024, 2016.
- 944 Middleton, N., Thomas, D. S. G. and Programme., U. N. E.: *World atlas of desertification*, UNEP, 1992.,  
945 London., 1992.
- 946 Miller, G. R., Chen, X., Rubin, Y., Ma, S. and Baldocchi, D. D.: Groundwater uptake by woody  
947 vegetation in a semiarid oak savanna, *Water Resour. Res.*, 46(10), doi:10.1029/2009WR008902, 2010.
- 948 Ministério da Agricultura do Mar do Ambiente e do Ordenamento do Território: *Estratégia de Adaptação*  
949 *da Agricultura e das Florestas às Alterações Climáticas*, Lisbon, 2013.
- 950 Montero, G., Ruiz-Peinado, R., Candela, J. A., Canellas, I., Gutierrez, M., Pavon, J., Alonso, A., Rio, M.  
951 d., Bachiller, A. and Calama, R.: *El pino pinonero (Pinus pinea L.) en Andalucía. Ecología, distribución y*  
952 *selvicultura*, edited by G. Montero, J. A. Candela, and A. Rodriguez, Consejería de Medio Ambiente,  
953 Junta de Andalucía, Sevilla., 2004.
- 954 Moran, P. A. P.: Notes on continuous stochastic phenomena, *Biometrika*, 37(1–2), 17–23 [online]  
955 Available from: <http://dx.doi.org/10.1093/biomet/37.1-2.17>, 1950.
- 956 Mourato, S., Moreira, M. and Corte-Real, J.: Water resources impact assessment under climate change  
957 scenarios in Mediterranean watersheds, *Water Resour. Manag.*, 29(7), 2377–2391, doi:10.1007/s11269-  
958 015-0947-5, 2015.
- 959 Münch, Z. and Conrad, J.: Remote sensing and GIS based determination of groundwater dependent  
960 ecosystems in the Western Cape, South Africa, *Hydrogeol. J.*, 15(1), 19–28, doi:10.1007/s10040-006-  
961 0125-1, 2007.
- 962 Nadezhdina, N., Ferreira, M. I., Conceição, N., Pacheco, C. A., Häusler, M. and David, T. S.: Water  
963 uptake and hydraulic redistribution under a seasonal climate: Long-term study in a rainfed olive orchard,  
964 *Ecohydrology*, 8(3), 387–397, doi:10.1002/eco.1545, 2015.
- 965 Naumburg, E., Mata-Gonzalez, R., Hunter, R., McLendon, T., Martin, D.: Phreatophytic vegetation and  
966 groundwater fluctuations: a review of current research and application of ecosystem response modelling  
967 with an emphasis on Great Basin vegetation. *Environmental Management* 35,726-740, 2005.

- 968 Neumann, R. B. and Cardon, Z. G.: The magnitude of hydraulic redistribution by plant roots: a review  
969 and synthesis of empirical and modeling studies, *New Phytol.*, 194(2), 337–352, doi:10.1111/j.1469-  
970 8137.2012.04088.x, 2012.
- 971 O’Grady, A. P., Eamus, D., Cook, P. G. and Lamontagne, S.: Groundwater use by riparian vegetation in  
972 the wet–dry tropics of northern Australia, *Aust. J. Bot.*, 54, 145–154, doi:10.1071/BT04164, 2006.
- 973 Orellana, F., Verma, P., Loheide, S. P. and Daly, E.: Monitoring and modeling water-vegetation  
974 interactions in groundwater-dependent ecosystems, *Rev. Geophys.*, 50(3), doi:10.1029/2011RG000383,  
975 2012.
- 976 Otieno, D. O., Kurz-Besson, C., Liu, J., Schmidt, M. W. T., Do, R. V. L., David, T. S., Siegwolf, R.,  
977 Pereira, J. S. and Tenhunen, J. D.: Seasonal variations in soil and plant water status in a *Quercus suber* L.  
978 stand: Roots as determinants of tree productivity and survival in the Mediterranean-type ecosystem, *Plant  
979 Soil*, 283(1–2), 119–135, doi:10.1007/s11104-004-7539-0, 2006.
- 980 Paço, T.A., David, T.S., Henriques, M.O.; Pereira, J.S., Valente, F., Banza, J., Pereira, F.L., Pinto, C.,  
981 David, J.S.: Evapotranspiration from a Mediterranean evergreen oak savannah: The role of trees and  
982 pasture, *J. Hydrol.*, 369 (1-2), 98–106, doi: 10.1016/j.jhydrol.2009.02.011, 2009.
- 983 Paulo, J. A., Palma, J. H. N., Gomes, A. A., Faias, S. P., Tomé, J. and Tomé, M.: Predicting site index  
984 from climate and soil variables for cork oak (*Quercus suber* L.) stands in Portugal, *New For.*, 46, 293–  
985 307, doi:10.1007/s11056-014-9462-4, 2015.
- 986 Peñuelas, J. and Filella, I.: Deuterium labelling of roots provides evidence of deep water access and  
987 hydraulic lift by *Pinus nigra* in a Mediterranean forest of NE Spain, *Environ. Exp. Bot.*, 49(3), 201–208,  
988 doi:10.1016/S0098-8472(02)00070-9, 2003.
- 989 Pérez Hoyos, I., Krakauer, N., Khanbilvardi, R. and Armstrong, R.: A Review of advances in the  
990 identification and characterization of groundwater dependent ecosystems using geospatial technologies,  
991 *Geosciences*, 6(2), 17, doi:10.3390/geosciences6020017, 2016a.
- 992 Pérez Hoyos, I., Krakauer, N. and Khanbilvardi, R.: Estimating the probability of vegetation to be  
993 groundwater dependent based on the evaluation of tree models, *Environments*, 3(2), 9,  
994 doi:10.3390/environments3020009, 2016b.
- 995 Pinto-Correia, T., Ribeiro, N. and Sá-Sousa, P.: Introducing the montado, the cork and holm oak  
996 agroforestry system of Southern Portugal, *Agrofor. Syst.*, 82(2), 99–104, doi:10.1007/s10457-011-9388-  
997 1, 2011.
- 998 Waroux, Y. P. and Lambin, E.F.: Monitoring degradation in arid and semi-arid forests and woodlands:  
999 The case of the argan woodlands (Morocco), *Applied Geography*, 32, 777-786, doi:  
1000 10.1016/j.apgeog.2011.08.005, 2012.
- 1001 QGIS Development Team: QGIS Geographic Information System. Open Source Geospatial Foundation  
1002 Project., 2017.
- 1003 R Development Core Team: R: A language and environment for statistical computing. R Foundation for  
1004 Statistical Computing, Vienna, Austria, 2016.
- 1005 Rivas-Martínez, S., Rivas-Sáenz, S. and Penas-Merino, A.: Worldwide bioclimatic classification system,  
1006 *Glob. Geobot.*, 1(1), 1–638, doi:10.5616/gg110001, 2011.
- 1007 Robinson, T. W.: Phreatophytes, *United States Geol. Surv. Water-Supply Pap.*, (1423), 84, 1958.
- 1008 Rodrigues, C. M., Moreira, M. and Guimarães, R. C.: Apontamentos para as aulas de hidrologia, 2011
- 1009 Sabaté, S., Gracia, C. A. and Sánchez, A.: Likely effects of climate change on growth of *Quercus ilex*,  
1010 *Pinus halepensis*, *Pinus pinaster*, *Pinus sylvestris* and *Fagus sylvatica* forests in the Mediterranean  
1011 region, *For. Ecol. Manage.*, 162(1), 23–37, doi:10.1016/S0378-1127(02)00048-8, 2002.

- 1012 Salinas, M. J., Blanca, G. and Romero, A. T.: Riparian vegetation and water chemistry in a basin under  
1013 semiarid Mediterranean climate, Andarax River, Spain. *Environmental Management*, 26(5), 539–552,  
1014 2000.
- 1015 Sardans, J. and Peñuelas, J.: Increasing drought decreases phosphorus availability in an evergreen  
1016 Mediterranean forest, *Plant Soil*, 267(1–2), 367–377, doi:10.1007/s11104-005-0172-8, 2004.
- 1017 Sarmiento, E. de M. and Dores, V.: The performance of the forestry sector and its relevance for the  
1018 portuguese economy, *Rev. Port. Estud. Reg.*, 34(3), 35–50, 2013.
- 1019 Schenk, H. J. and Jackson, R. B.: Rooting depths, lateral root spreads and belowground aboveground  
1020 allometries of plants in water limited ecosystems, *J. Ecol.*, 480–494, doi:10.1046/j.1365-  
1021 2745.2002.00682.x, 2002.
- 1022 Silva, J. S. and Rego, F. C.: Root to shoot relationships in Mediterranean woody plants from Central  
1023 Portugal, *Biologia*, 59, 109–115, 2004.
- 1024 Singer, M. B., Stella, J. C., Dufour, S., Piégay, H., Wilson, R. J. S. and Johnstone, L.: Contrasting water-  
1025 uptake and growth responses to drought in co-occurring riparian tree species, *Ecohydrology*, 6(3), 402–  
1026 412, doi:10.1002/eco.1283, 2012.
- 1027 Soares, P. M. M., Cardoso, R. M., Ferreira, J. J. and Miranda, P. M. A.: Climate change and the  
1028 Portuguese precipitation: ENSEMBLES regional climate models results, *Clim. Dyn.*, 45(7–8), 1771–  
1029 1787, doi:10.1007/s00382-014-2432-x, 2015.
- 1030 Soares, P. M. M., Cardoso, R. M., Lima, D. C. A. and Miranda, P. M. A.: Future precipitation in Portugal:  
1031 high-resolution projections using WRF model and EURO-CORDEX multi-model ensembles, *Clim Dyn*,  
1032 49, 2503–2530, doi:10.1007/s00382-016-3455-2, 2017.
- 1033 Spinoni, J., Vogt, J. V., Naumann, G., Barbosa, P. and Dosio, A.: Will drought events become more  
1034 frequent and severe in Europe?, *Int. J. Climatol.*, 38(4), 1718–1736, doi:10.1002/joc.5291, 2017.
- 1035 Stewart Fotheringham, A., Charlton, M. and Brunson, C.: The geography of parameter space: an  
1036 investigation of spatial non-stationarity, *Int. J. Geogr. Inf. Syst.*, 10(5), 605–627,  
1037 doi:10.1080/02693799608902100, 1996.
- 1038 Stigter, T. Y., Nunes, J. P., Pisani, B., Fakir, Y., Hugman, R., Li, Y., Tomé, S., Ribeiro, L., Samper, J.,  
1039 Oliveira, R., Monteiro, J. P., Silva, A., Tavares, P. C. F., Shapouri, M., Cancela da Fonseca, L. and El  
1040 Himer, H.: Comparative assessment of climate change and its impacts on three coastal aquifers in the  
1041 Mediterranean, *Reg. Environ. Chang.*, 14(S1), 41–56, doi:10.1007/s10113-012-0377-3, 2014.
- 1042 Stone, E. L. and Kalisz, P. J.: On the maximum extent of tree roots, *For. Ecol. Manage.*, 46(1–2), 59–102,  
1043 doi:10.1016/0378-1127(91)90245-Q, 1991.
- 1044 Thornthwaite, C. W.: An approach toward a rational classification of climate, *Geogr. Rev.*, 38(1), 55–94,  
1045 1948.
- 1046 Valentini, R., Scarascia, G. E. and Ehleringer, J. R.: Hydrogen and carbon isotope ratios of selected  
1047 species of a Mediterranean macchia ecosystem, *Funct. Ecol.*, 6(6), 627–631, 1992.
- 1048 Vicente-Serrano, S. M., Beguería, S. and López-Moreno, J. I.: A multiscalar drought index sensitive to  
1049 global warming: The standardized precipitation evapotranspiration index, *J. Clim.*, 23(7), 1696–1718,  
1050 doi:10.1175/2009JCLI2909.1, 2010.
- 1051 Vörösmarty, C. J., Green, P., Salisbury, J. and Lammers, R. B.: Global water resources: Vulnerability  
1052 from climate change and population growth, *Science*, 289, 284–288, doi:10.1126/science.289.5477.284,  
1053 2000.
- 1054 Xiao R., He X., Zhang Y., Ferreira V. G. and Chang L.: Monitoring groundwater variations from satellite  
1055 gravimetry and hydrological models: A comparison with in-situ measurements in the mid-atlantic region  
1056 of the United States, *Remote Sensing*, 7 (1), 686–703, doi: 10.3390/rs70100686, 2015.

- 1057 Zomer, R., Trabucco, A., Coe, R., Place, F.: Trees on farm: analysis of global extent and geographical  
1058 patterns of agroforestry, ICRAF Working Paper-World Agroforestry Centre, 89, doi:10.5716/WP16263,  
1059 2009.
- 1060 Zou, C. B., Barnes, P. W., Archer, S. and Mcmurtry, C. R.: Soil moisture redistribution as a mechanism  
1061 of facilitation in savanna tree–shrub clusters, *Ecophysiology*, (145), 32–40, doi:10.1007/s00442-005-  
1062 0110-8, 2005.



1063 **Figure and Table Legends**

1064

1065 Table 1: Environmental variables for characterization of the suitability of GDV in the study area.

1066 Table 2: Effect of variable removal in the performance of GWR model linking the Kernel density of *Quercus suber*,  
1067 *Quercus ilex* and *Pinus pinea* to predictors Aridity Index (AI); Ombrothermic Index of the summer quarter and the  
1068 immediately previous month (Ios4); Groundwater Depth (GWDepth); Drainage density (Dd); Slope; and Soil type.  
1069 The model with all predictors is highlighted in grey and the final model used in this study is in bold.

1070 Table 3: Comparison of Adjusted R-squared and second-order Akaike Information Criterion (AICc) between the simple  
1071 regression and the GWR models.

1072 Table 4: Classification scores for each predictor. A score of 3 to highly suitable areas and 1 to highly less suitable  
1073 for GDV.

1074 Table A1: Classification scores for soil type predictor.

1075 Table A2: Correlations between predictor variables and principal component axis. The most important predictors for  
1076 each axis (when squared correlation is above 0.3) are showed in bold. The cumulative proportion of variance  
1077 explained by each principal component axis is shown at the bottom of the table.

1078

1079 Figure 01: Study area. On the left the location of Alentejo in the Iberian Peninsula; on the right, the elevation  
1080 characterization of the study area with the main river courses from Tagus, Sado and Guadiana basins. Names of the  
1081 main rivers are indicated near to their location in the map.

1082 Figure 02: Large well and piezometer data points used for groundwater depth calculation. Squares represent  
1083 piezometers data points and triangle represent large well data points.

1084 Figure 03: Map of Kernel Density weighted by cover percentage of *Q. suber*, *Q. ilex* and *P. pinea*.

1085 Figure 04: Map of environmental layers used in model fitting. (a) – Soil type; (b) – Slope; (c) – Groundwater Depth  
1086 (Depth); (d) – Ombrothermic Index of the summer quarter and the immediately previous month (Ios4); (e) – Aridity  
1087 Index (AI).

1088 Figure 05: Spatial distribution of local  $R^2$  from the fitting of the Geographically Weighted Regression.

1089 Figure 06: Spatial distribution of model residuals from the fitting of the Simple Linear model (a) and Geographically  
1090 Weighted Regression (b).

1091 Figure 07: Map of local model coefficients for each variable. (a) – Aridity Index (AI); (b) - Ombrothermic Index of the  
1092 summer quarter and the immediately previous month (Ios4); (c) – Groundwater Depth (GWDepth); (d) – Drainage  
1093 density; (e) - Slope.

1094 Figure 08: Boxplot of GWR model coefficient values for each predictor. AI is Aridity Index; Ios4 is the ombrothermic  
1095 index of the hottest month of the summer quarter and the immediately previous month; GWDepth is Groundwater  
1096 Depth and Dd is drainage density.

1097 Figure 09: Suitability map for Groundwater Dependent Vegetation.

1098 Figure 10: Validation map corresponding to the NDWI anomaly considering the months of June, July and August of  
1099 the extremely dry year of 2005 in the Alentejo area. Brown colors (corresponding to more negative values) indicate  
1100 vegetation in water stress.

1101

1102 Figure A1: Boxplot of the main predictors used for the Geographically Weighted Regression model fitting (top) and  
1103 the response variable (below), for the total data (left) and for the 5% subsample (right).

1104 Figure A2: Correlation plot between all environmental variables expected to affect the presence of the Groundwater  
1105 Dependent Vegetation. Ios1, Ios3 and Ios4 are ombrothermin indices of, respectively, the hottest month of the  
1106 summer quarter, the summer quarter and the summer quarter and the immediately previous month; Io is the annual  
1107 ombrothermic index, Spei\_extreme and Spei\_severe are, respectively, the number of months with extreme and severe  
1108 Standardized Precipitation Evapotranspiration Index; AI is Aridity index; GWDepth is Groundwater depth, Dd is the  
1109 Drainage density; Thickness and Soil type refer to soil properties.

1110 Figure B1 – Predictors maps after score classification. (a) – Aridity Index (AI); (b) – Ombrothermic Index of the  
1111 summer quarter and the immediately previous month (Ios4); (c) – Groundwater Depth (GWDepth); (d) – Drainage  
1112 density (Dd); (e) – Slope.

1113

1114

1115 **Table 1: Environmental variables for the characterization of the suitability of GDV in the study area.**

| <b>Variable code</b> | <b>Variable type</b>                                                                               | <b>Source</b>                                         | <b>Resolution and Spatial extent</b>                                 |
|----------------------|----------------------------------------------------------------------------------------------------|-------------------------------------------------------|----------------------------------------------------------------------|
| <b>Slope</b>         | <b>Slope (%)</b>                                                                                   | This work                                             | 0.000256 degrees (25m) raster resolution                             |
| <b>Soil type</b>     | <b>Soil type in the first soil layer</b>                                                           | SNIAmb (© Agência Portuguesa do Ambiente, I.P., 2017) | Converted from vectorial to 0.000256 degrees (25m) resolution raster |
| <b>Thickness</b>     | <b>Soil thickness (cm)</b>                                                                         | EPIC WebGIS Portugal (Barata et al., 2015)            | Converted from vectorial to 0.000256 degrees (25m) resolution raster |
| <b>GWDepth</b>       | <b>Depth to groundwater (m)</b>                                                                    | This work                                             | 0.000256 degrees (25m) raster resolution                             |
| <b>Dd</b>            | <b>Drainage Density</b>                                                                            | This work                                             | 0.000256 degrees (25m) raster resolution                             |
| <b>Spei_severe</b>   | <b>Number of months with severe SPEI</b>                                                           | This work                                             | 0.000256 degrees (25m) raster resolution<br>Time coverage 1950-2010  |
| <b>SPEI_extreme</b>  | <b>Number of months with extreme SPEI</b>                                                          | This work                                             | 0.000256 degrees (25m) raster resolution<br>Time coverage 1950-2010  |
| <b>AI</b>            | <b>Aridity Index</b>                                                                               | This work                                             | 0.000256 degrees (25m) raster resolution<br>Time coverage 1950-2010  |
|                      | <b>Annual Ombrothermic Index</b>                                                                   |                                                       |                                                                      |
| <b>Io</b>            | Annual average (January to December)                                                               | This work                                             | 0.000256 degrees (25m) raster resolution<br>Time coverage 1950-2010  |
|                      | <b>Ombrothermic Index of the hottest month of the summer quarter (J, J and A)</b>                  |                                                       |                                                                      |
| <b>Ios1</b>          |                                                                                                    | This work                                             | 0.000256 degrees (25m) raster resolution<br>Time coverage 1950-2010  |
|                      | <b>Ombrothermic Index of the summer quarter (J, J and A)</b>                                       |                                                       |                                                                      |
| <b>Ios3</b>          |                                                                                                    | This work                                             | 0.000256 degrees (25m) raster resolution<br>Time coverage 1950-2010  |
|                      | <b>Ombrothermic Index of the summer quarter and the immediately previous month (M, J, J and A)</b> |                                                       |                                                                      |
| <b>Ios4</b>          |                                                                                                    | This work                                             | 0.000256 degrees (25m) raster resolution<br>Time coverage 1950-2010  |

1116

1117

1118

1119

1120

1121

1122

1123

1124

1125 **Table 2: Effect of variable removal in the performance of GWR model linking the Kernel density of *Quercus***  
 1126 ***suber*, *Quercus ilex* and *Pinus pinea* to predictors Aridity Index (AI); Ombrothermic Index of the summer**  
 1127 **quarter and the immediately previous month (Ios4); Groundwater Depth (GWDepth); Drainage density (Dd);**  
 1128 **Slope; and Soil type. The model with all predictors is highlighted in grey and the final model used in this study**  
 1129 **is in bold.**

| Type | Model                                              | Discarded predictor      | AICc            | Quasi-global R <sup>2</sup> |
|------|----------------------------------------------------|--------------------------|-----------------|-----------------------------|
| GWR  | Density~ios4 +ai + slope + Dd + GWDepth + soiltype |                          | 27389.74        | 0.926481                    |
| GWR  | Density~ios4 + slope + Dd + GWDepth + soiltype     | Ai                       | 28695.14        | 0.9085754                   |
| GWR  | Density~ai + slope + Dd + GWDepth + soiltype       | Ios4                     | 28626.88        | 0.9095033                   |
| GWR  | Density~ios4 +ai + GWDepth + slope + soiltype      | Dd                       | 27909.86        | 0.9184337                   |
| GWR  | Density~ios4 +ai + Dd + GWDepth + soiltype         | Slope                    | 27429.55        | 0.924176                    |
| GWR  | Density~ios4 +ai + Dd + slope+ soiltype            | GWDepth                  | 27742.67        | 0.9208344                   |
| GWR  | <b>Density~ios4 +ai + Dd + GWDepth + slope</b>     | <b>Soiltype 3 levels</b> | <b>18050.76</b> | <b>0.9916192</b>            |

1130

1131 **Table 3: Comparison of Adjusted R-squared and second-order Akaike Information Criterion (AICc) between**  
 1132 **the simple linear regression and the GWR model.**

| Model | R-squared | AICc  | p-value |
|-------|-----------|-------|---------|
| OLS   | 0.02      | 42720 | <0.001  |
| GWR   | 0.99 *    | 18851 | -       |

1133 \*Quasi-global R<sup>2</sup>

1134

1135

1136

1137

1138

1139

1140

1141

1142

1143

1144

1145

1146 **Table 4: Classification scores for each predictor. A score of 3 was given to highly suitable areas and 1 to highly**  
 1147 **less suitable areas for GDV.**

| Predictor            | Class     | Score |
|----------------------|-----------|-------|
| Slope                | 0%-5%     | 1     |
|                      | 5%-10%    | 2     |
|                      | >10%      | 3     |
| Groundwater<br>Depth | >15 m     | 1     |
|                      | 1.5m-15m  | 3     |
|                      | ≤1.5m     | 1     |
| Aridity<br>Index     | 0.6-0.68  | 1     |
|                      | 0.68-0.75 | 2     |
|                      | ≥0.75     | 3     |
| Ios4                 | <0.28     | 1     |
|                      | 0.28-0.64 | 2     |
|                      | ≥0.64     | 3     |
| Dd                   | ≤0.5      | 3     |
|                      | >0.5      | 1     |

1148

1149

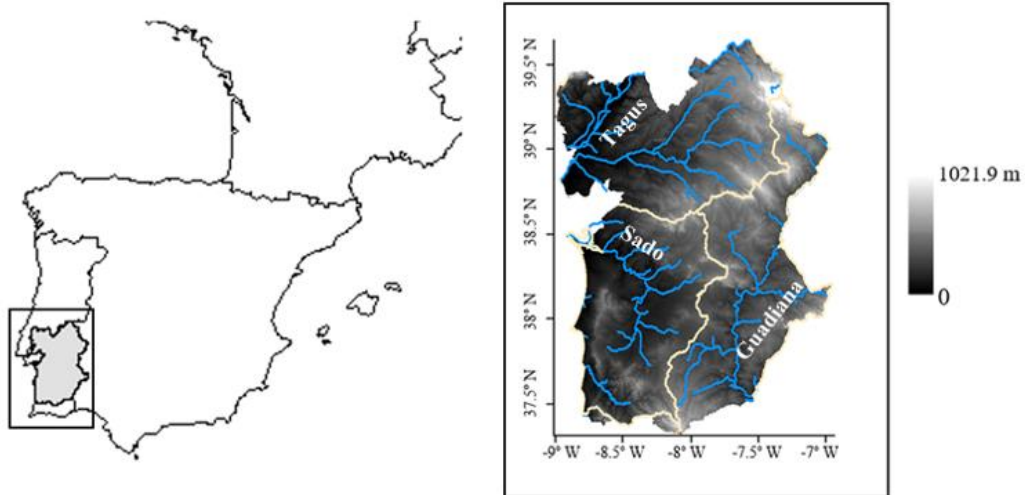

1150

1151

1152 **Figure 01: Study area.** On the left the location of Alentejo in the Iberian Peninsula; on the right, the elevation  
 1153 characterization of the study area with the main river courses from Tagus, Sado and Guadiana basins. Names  
 1154 of the main rivers are indicated near to their location in the map.

1155

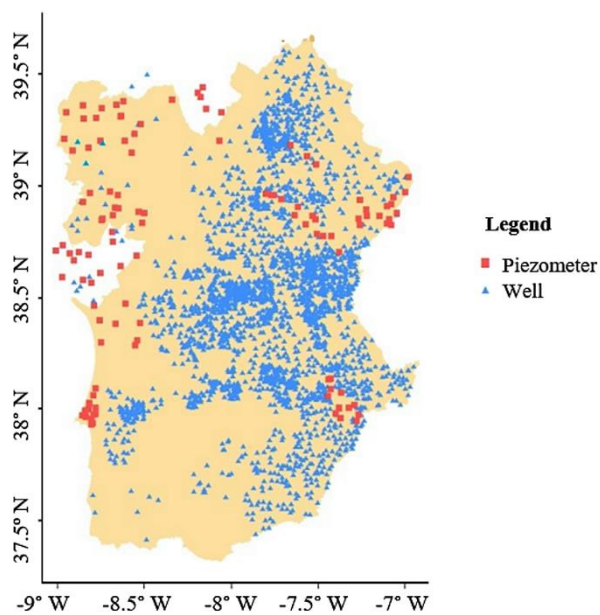

1156

1157 **Figure 02: Large well and piezometer data points used for groundwater depth calculation.** Squares represent  
 1158 piezometers data points and triangle represent large well data points.

1159

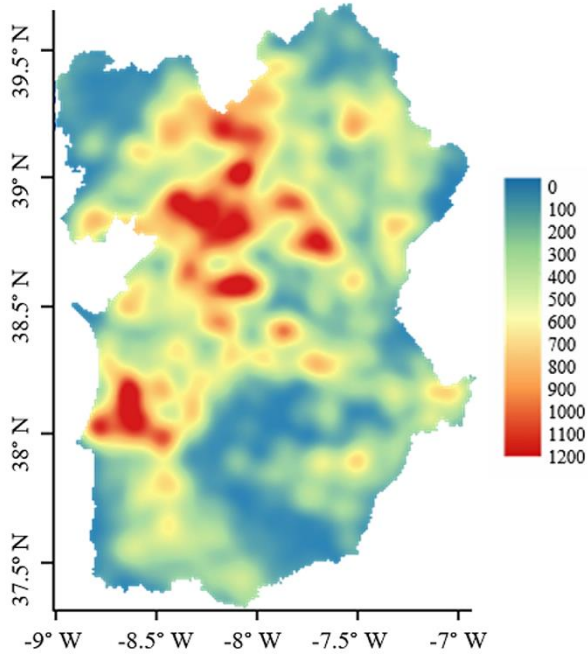

1160

1161 **Figure 03: Map of Kernel Density weighted by cover percentage of *Q. suber*, *Q. ilex* and *P. pinca*.**

1162

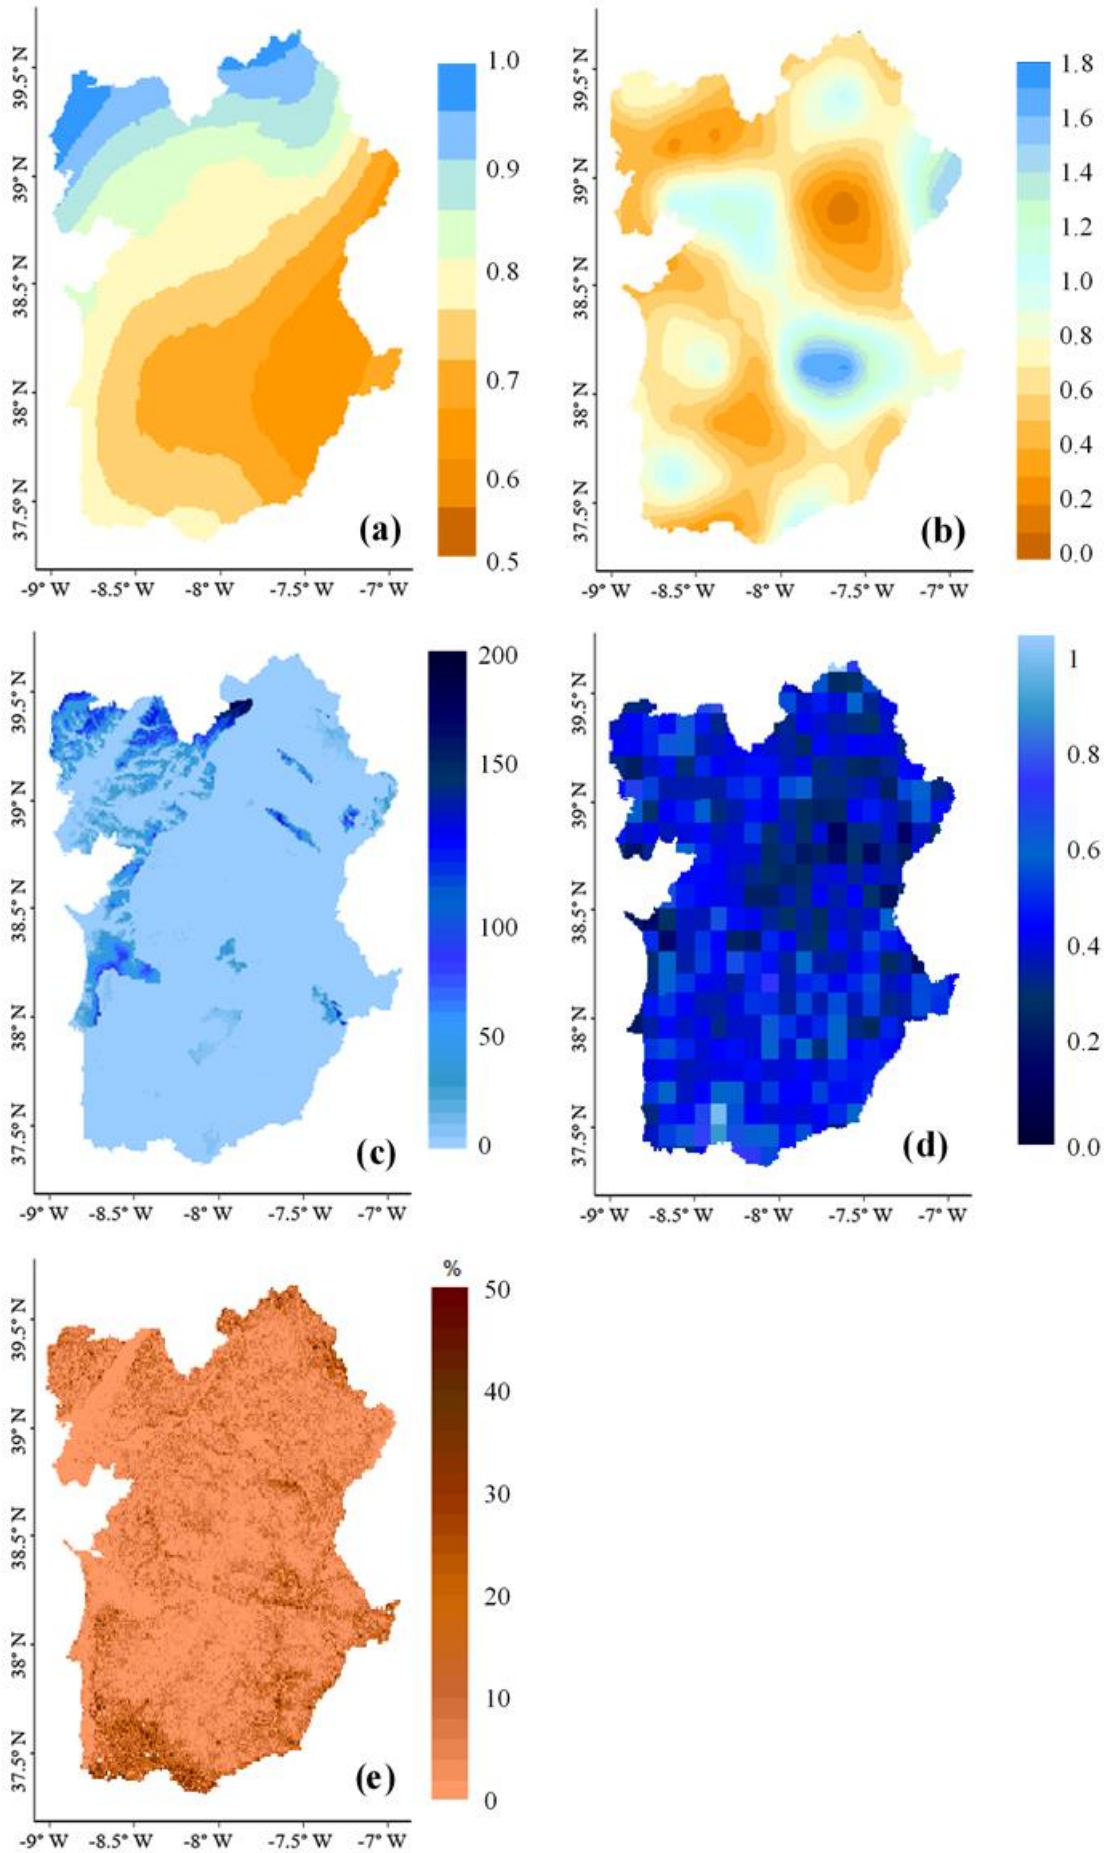



1164 Figure 04: Map of environmental layers used in model fitting. (a) – Soil type; (b) – Slope; (c) – Groundwater  
1165 Depth (Depth); (d) – Ombrothermic Index of the summer quarter and the immediately previous month (Ios4);  
1166 (e) – Aridity Index (AI).

1167

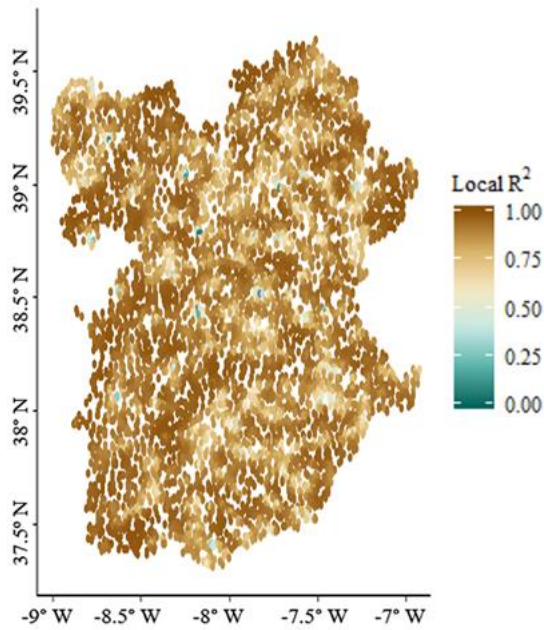

1168

1169 Figure 05: Spatial distribution of local R<sup>2</sup> from the fitting of the Geographically Weighted Regression.

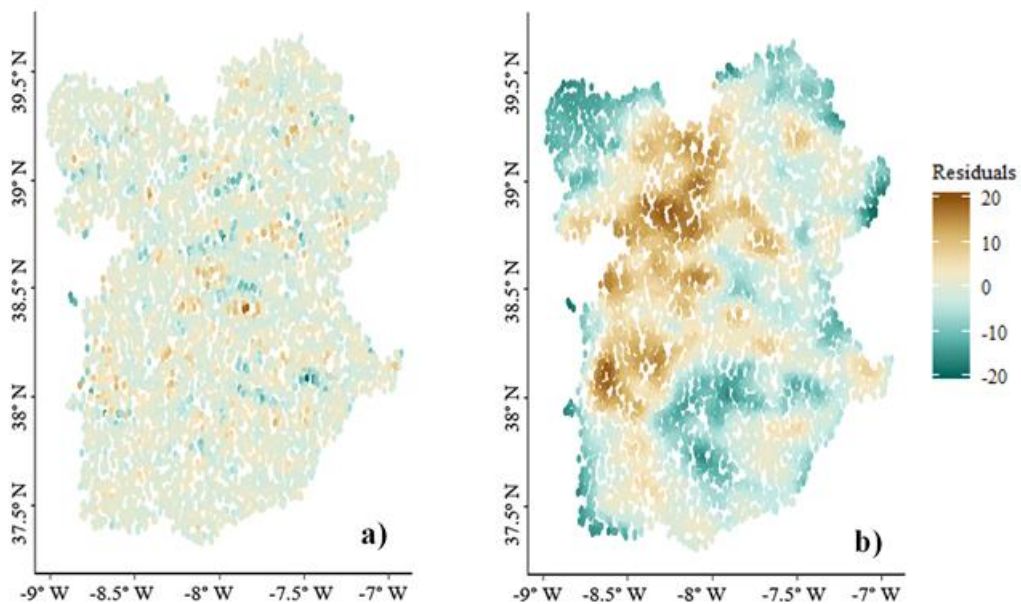

1170

1171 Figure 06: Spatial distribution of model residuals from the fitting of the Geographically Weighted Regression  
1172 (a) and Simple Linear model(b).

1173

1174

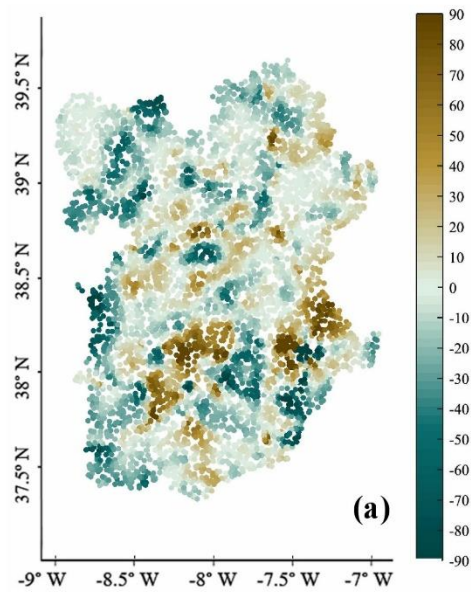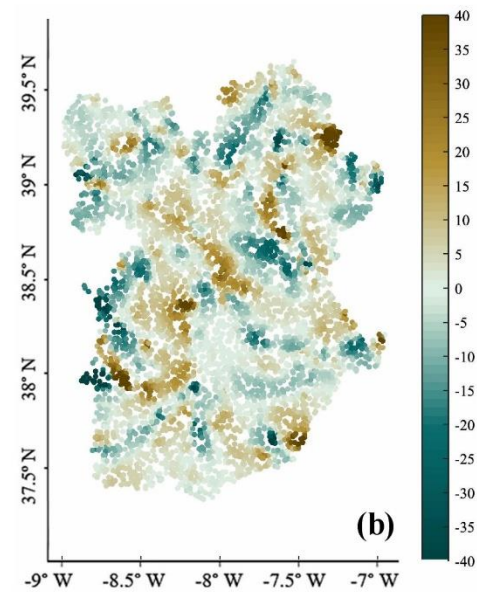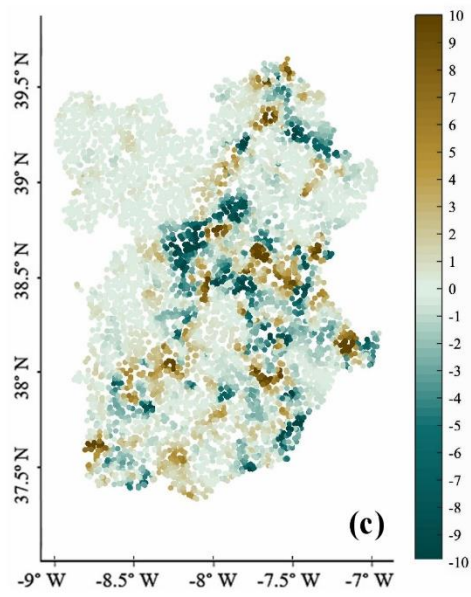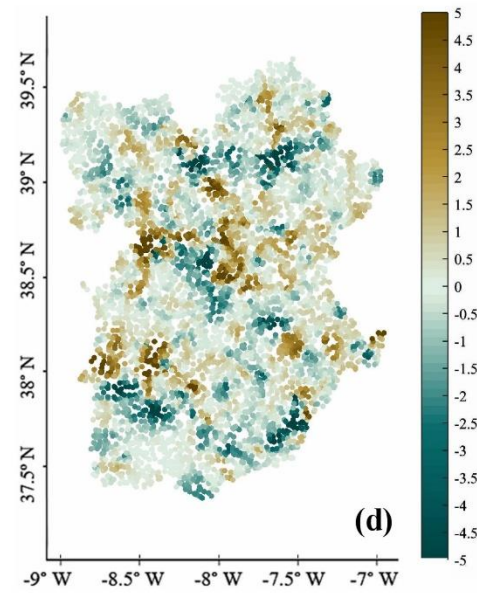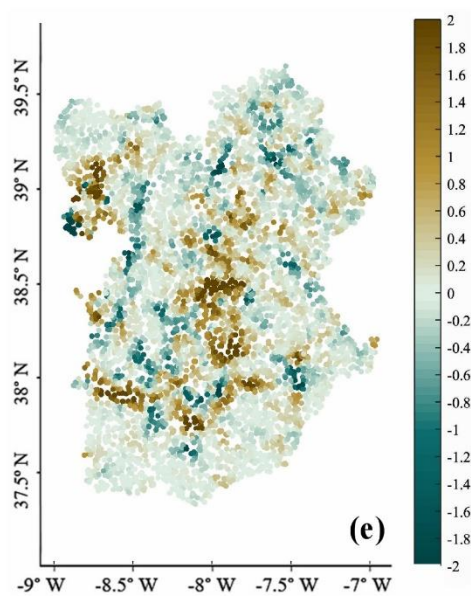

1176 Figure 07: Map of local model coefficients for each variable. (a) – Aridity Index; (b) - Ombrothermic Index of  
1177 the summer quarter and the immediately previous month (Ios4); (c) – Groundwater Depth (GWDepth); (d) –  
1178 Drainage density and (e) – Slope.

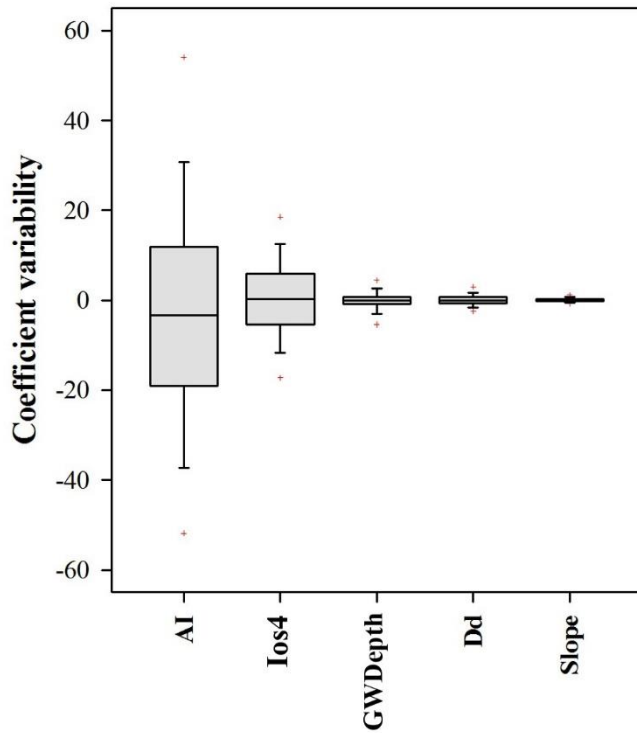

1179

1180 Figure 08 – Boxplot of GWR model coefficient values for each predictor. AI is Aridity Index; Ios4 is the  
1181 ombrothermic index of the hottest month of the summer quarter and the immediately previous month; GWDepth  
1182 is Groundwater Depth and Dd is drainage density.

1183

1184

1185

1186

1187

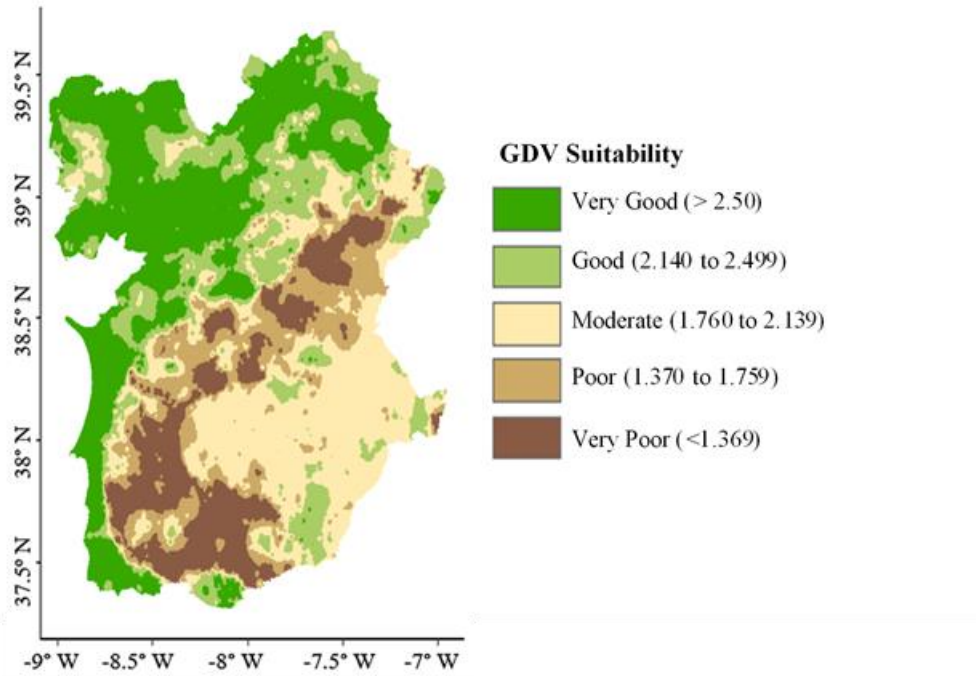

1188

1189 **Figure 09: Suitability map for Groundwater Dependent Vegetation.**

1190

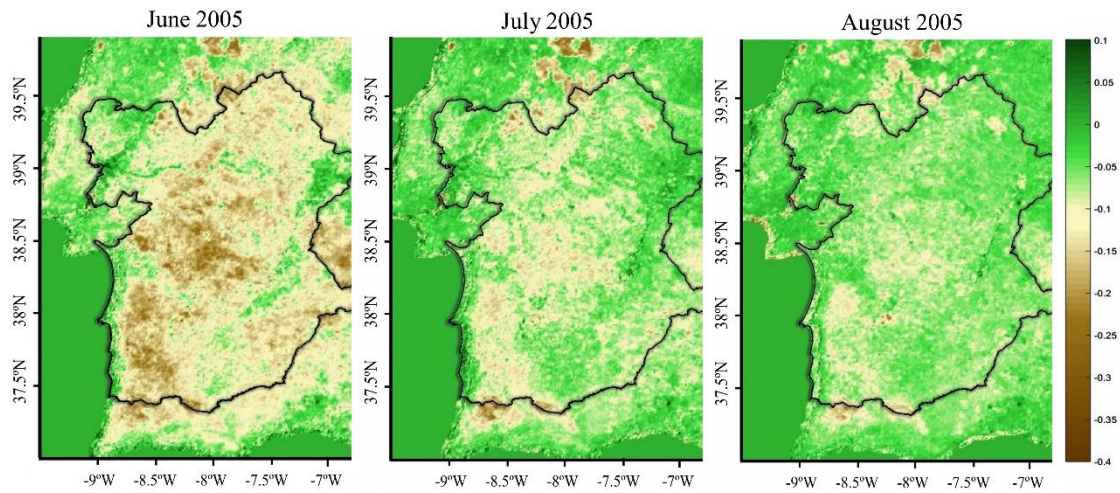

1191

1192 **Figure 10: Validation map corresponding to the NDWI anomaly considering the months of June, July and**  
 1193 **August of the extremely dry year of 2005 in the Alentejo area. Brown colors (corresponding to more negative**  
 1194 **values) indicate vegetation in water stress.**

1195

1196



1197 Appendix A

1198 Table A1: Classification scores for the soil type predictor.

| Predictor | Class                                                                                                                                                                  | Score |
|-----------|------------------------------------------------------------------------------------------------------------------------------------------------------------------------|-------|
| Soil type | Eutric Cambisols; Dystric Regosol; Humic Cambisols; Haplic Luvisols; Gleyic Luvisols; Ferric Luvisols; Chromic Luvisols associated with Haplic Luvisols; Ortic Podzols | 3     |
|           | Calcaric Cambisols; Dystric Regosol associated with Umbric Leptosols; Eutric Regosols; Vertic Luvisols; Eutric Planosols; Cambic Arenosols                             | 2     |
|           | Chromic Cambisols; Eutric fluvisols; Chromic Luvisols; Gleyic Solonchak; Eutric Vertisols                                                                              | 1     |

1199

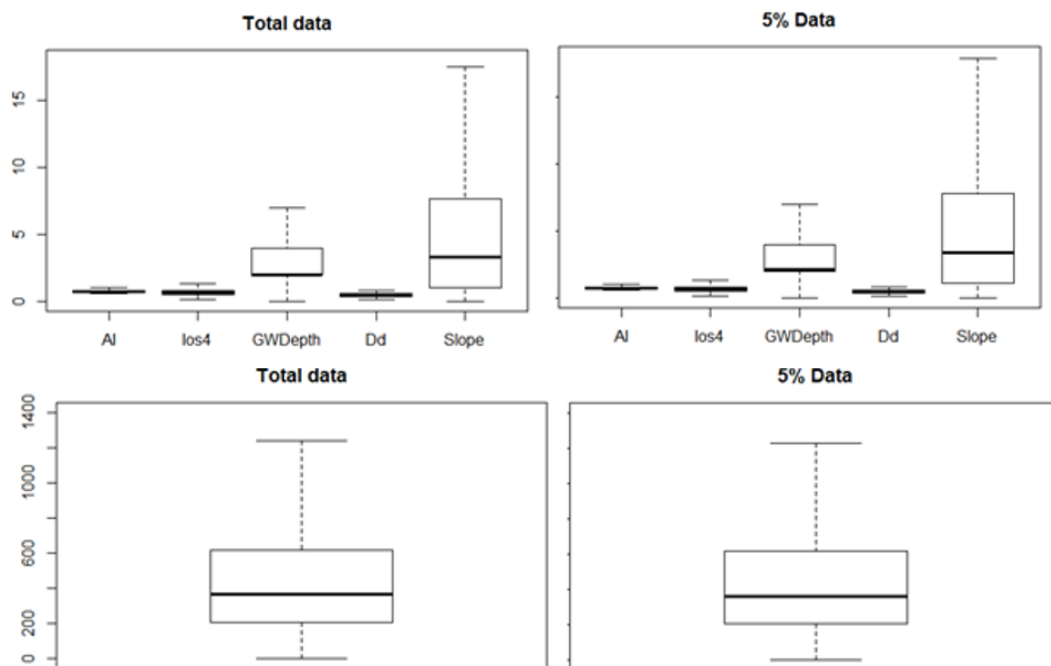

1200

1201

1202 Figure A1: Boxplot of the main predictors for the final Geographically Weighted Regression model fitting  
 1203 (top) and the response variable (below), for the total data (left) and for the 5% subsample (right).

1204

1205

1206

1207

1208

1209

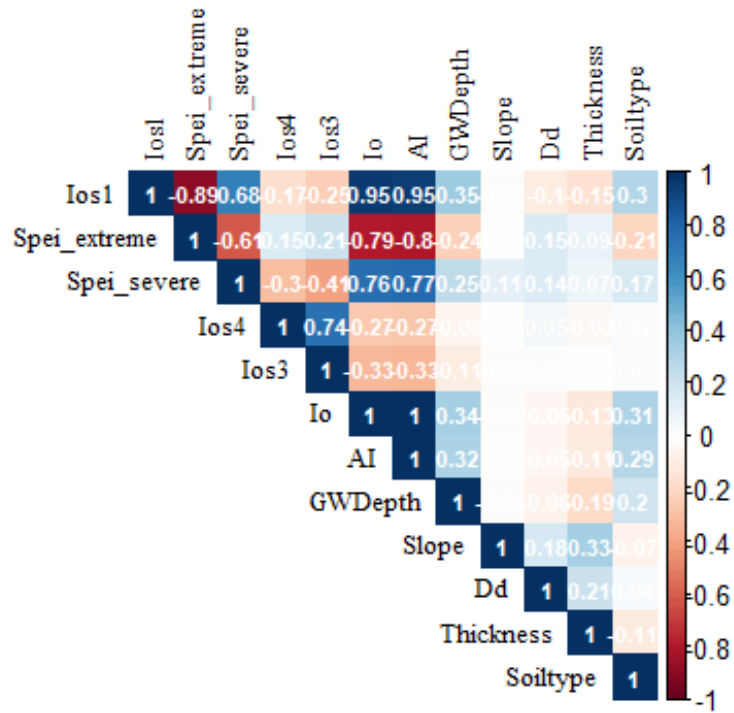

1210 Figure A2: Correlation plot between all environmental variables expected to affect the presence of the  
 1211 Groundwater Dependent Vegetation. Ios1, Ios3, Ios4 are ombrothermic indices of, respectively, the hottest  
 1212 month of the summer quarter, the summer quarter and the summer quarter and the immediately previous  
 1213 month; Io is the annual ombrothermic index, Spei\_extreme and Spei\_severe are, respectively, the number of  
 1214 months with extreme and severe Standardized Precipitation Evapotranspiration Index; AI is Aridity Index;  
 1215 GWDepth is Groundwater Depth, ; Dd is the Drainage density; Thickness and Soiltype refer to soil properties.

1216

1217

1218

1219 Table A2: Correlations between predictor variables and principal component axis. The most important predictors for each axis (when squared correlation is above 0.3) are showed in  
 1220 bold. The cumulative proportion of variance explained by each principal component axis is shown at the bottom of the table

1221

|                              | PC1         | PC2         | PC3         | PC4         | PC5         | PC6         | PC7         | PC8         | PC9         | PC10        | PC11        | PC12        |
|------------------------------|-------------|-------------|-------------|-------------|-------------|-------------|-------------|-------------|-------------|-------------|-------------|-------------|
| <b>Slope</b>                 | <0.001      | <b>0.32</b> | 0.13        | 0.06        | 0.14        | 0.18        | 0.18        | <0.001      | 0.03        | 0.03        | <0.01       | <0.01       |
| <b>AI</b>                    | <b>0.94</b> | <0.001      | 0.01        | <0.01       | <0.001      | <0.01       | <0.001      | <0.001      | 0.22        | <b>0.33</b> | <b>0.40</b> | <b>0.68</b> |
| <b>Io</b>                    | <b>0.93</b> | <0.01       | 0.01        | <0.01       | <0.001      | <0.01       | <0.001      | <0.001      | 0.24        | <b>0.38</b> | 0.24        | <b>0.72</b> |
| <b>Ios1</b>                  | <b>0.89</b> | 0.02        | 0.04        | 0.01        | <0.001      | <0.001      | <0.001      | 0.02        | 0.03        | 0.14        | <b>0.82</b> | 0.10        |
| <b>Ios3</b>                  | 0.21        | 0.18        | <b>0.47</b> | <0.01       | <0.01       | <0.001      | <0.01       | 0.11        | <b>0.64</b> | <b>0.33</b> | <0.01       | <0.01       |
| <b>Ios4</b>                  | 0.15        | 0.19        | <b>0.53</b> | <0.001      | <0.001      | <0.01       | <0.001      | <b>0.33</b> | <b>0.53</b> | <b>0.33</b> | 0.05        | <0.01       |
| <b>Spei_severe</b>           | <b>0.66</b> | 0.08        | 0.01        | <0.01       | <0.001      | -0.02       | <0.01       | <b>0.77</b> | 0.08        | <b>0.40</b> | 0.11        | 0.01        |
| <b>Spei_extreme</b>          | <b>0.72</b> | 0.01        | 0.04        | 0.05        | <0.01       | <0.001      | <0.01       | <b>0.36</b> | <b>0.44</b> | 0.57        | 0.29        | 0.05        |
| <b>GWDepth</b>               | 0.16        | 0.05        | 0.01        | <b>0.33</b> | 0.14        | 0.26        | 0.06        | 0.06        | 0.04        | 0.06        | 0.04        | 0.01        |
| <b>Dd</b>                    | <0.01       | 0.25        | 0.11        | 0.20        | 0.08        | <b>0.32</b> | <0.01       | 0.29        | 0.06        | 0.04        | <0.01       | <0.01       |
| <b>Soil type</b>             | 0.02        | 0.19        | 0.03        | 0.22        | <b>0.46</b> | 0.05        | 0.02        | 0.06        | 0.03        | 0.05        | 0.03        | <0.01       |
| <b>Thickness</b>             | 0.02        | <b>0.46</b> | 0.09        | 0.03        | 0.06        | 0.01        | <b>0.32</b> | 0.11        | 0.03        | 0.09        | 0.01        | <0.01       |
| <b>Cumulative proportion</b> | 0.39        | 0.54        | 0.66        | 0.74        | 0.81        | 0.88        | 0.93        | 0.96        | 0.98        | 0.99        | 0.99        | 1           |

1222

1223

1224

1225 **Appendix B**

1226



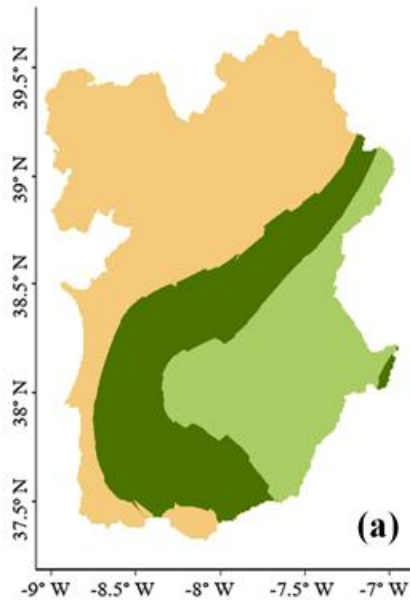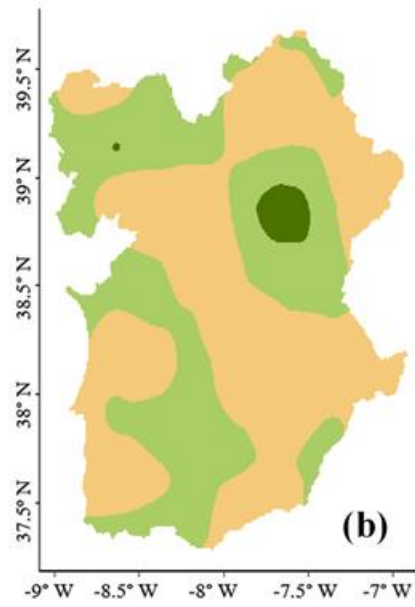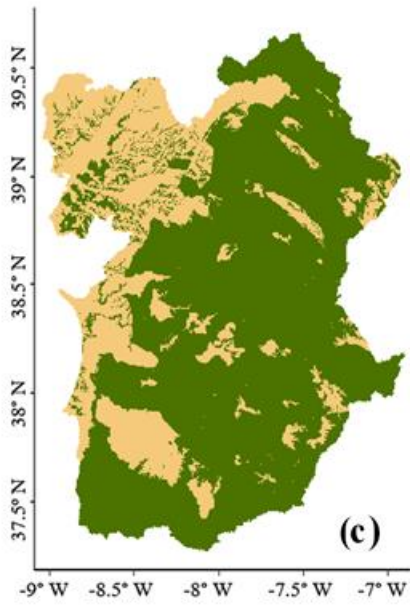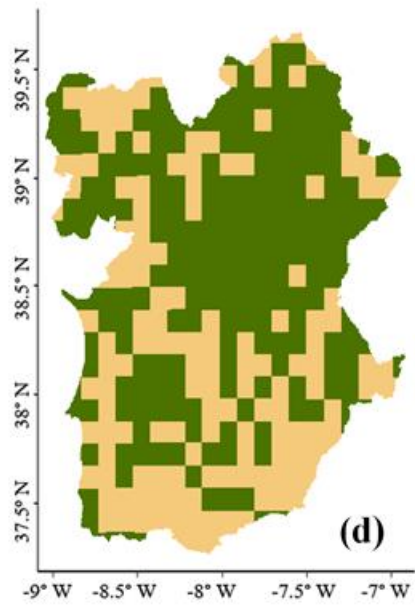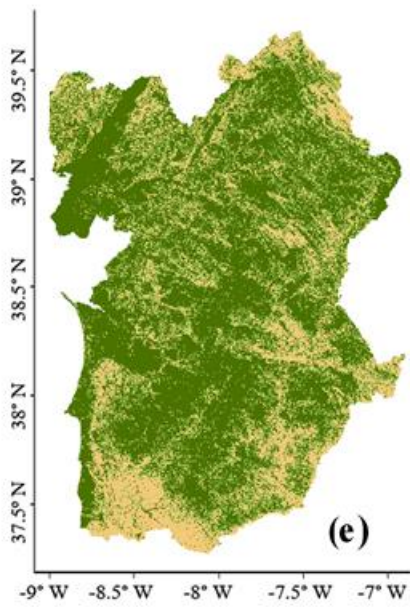

Classification Score

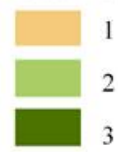

1228 **Figure B1 – Predictors maps after score reclassification. (a) – Aridity Index (AI); (b) – Ombrothermic Index of**  
1229 **the summer quarter and the immediately previous month (Ios4); (c) – Groundwater Depth (GWDepth); (d) –**  
1230 **Drainage density (Dd); (e) – Slope.**

1231

1232

1233

1234

1235

1236

1237

1238
